# Supplementary material for: Direct trifluoromethylation of imidazoheterocycles in a recyclable medium at room temperature
Source: Royal Society of Chemistry journal article supplement (doi:10.1039/c5ra02888d), 2015-01-01

# Supporting Information

## Direct Trifluoromethylation of Imidazoheterocycles in a Recyclable Medium at Room Temperature

Xiao-Ming Ji,<sup>a,b</sup> Liang Wei,<sup>b</sup> Fan Chen<sup>b</sup> and Ri-Yuan Tang<sup>\*a,b</sup>

<sup>a</sup>*College of Science, South China Agricultural University, Guangzhou 510642, China.*

<sup>b</sup>*College of Chemistry and Materials engineering, Wenzhou University, Wenzhou, 325035, China*

[try@wzu.edu.cn](mailto:try@wzu.edu.cn)

**NMR Spectra for products**

### 6-phenyl-5-(trifluoromethyl)imidazo[2,1-b]thiazole (2a)

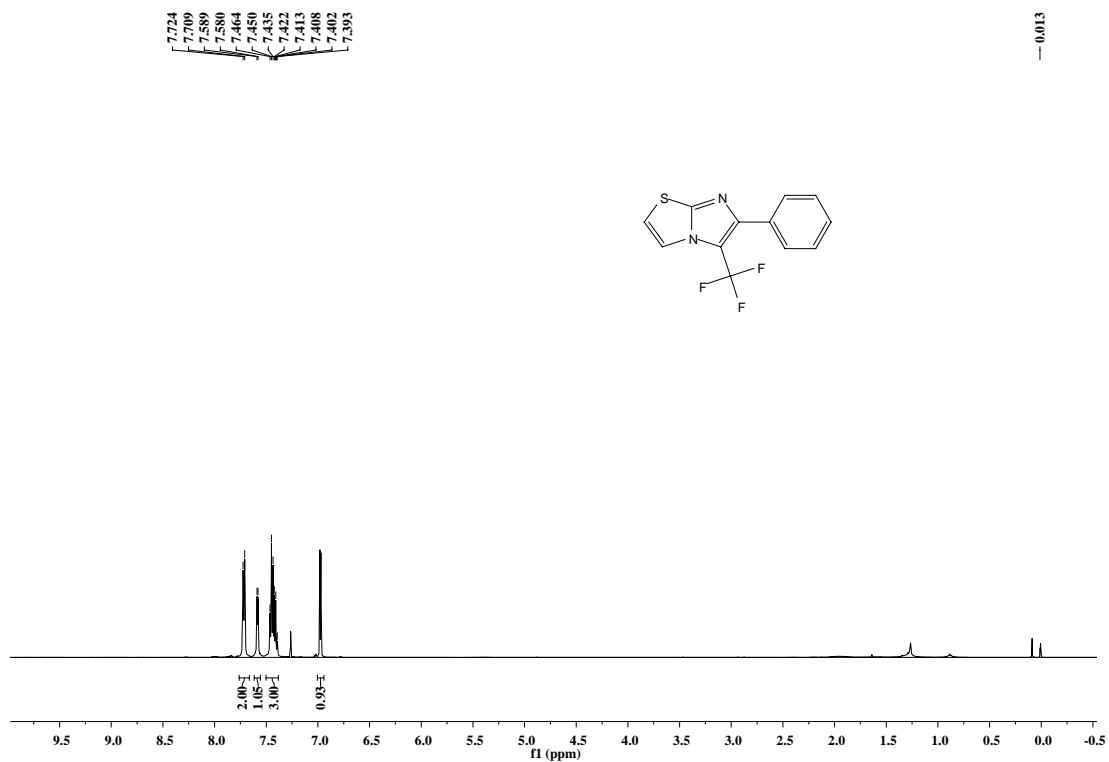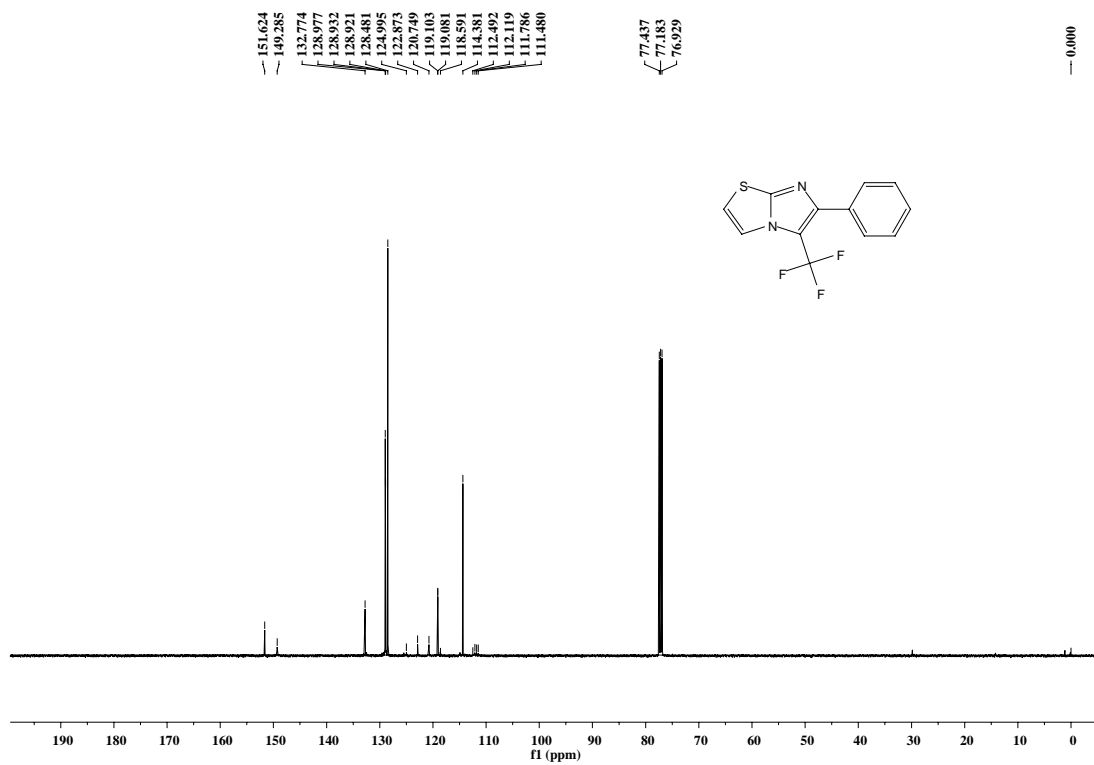

6-(*p*-tolyl)-5-(trifluoromethyl)imidazo[2,1-*b*]thiazole (2b)

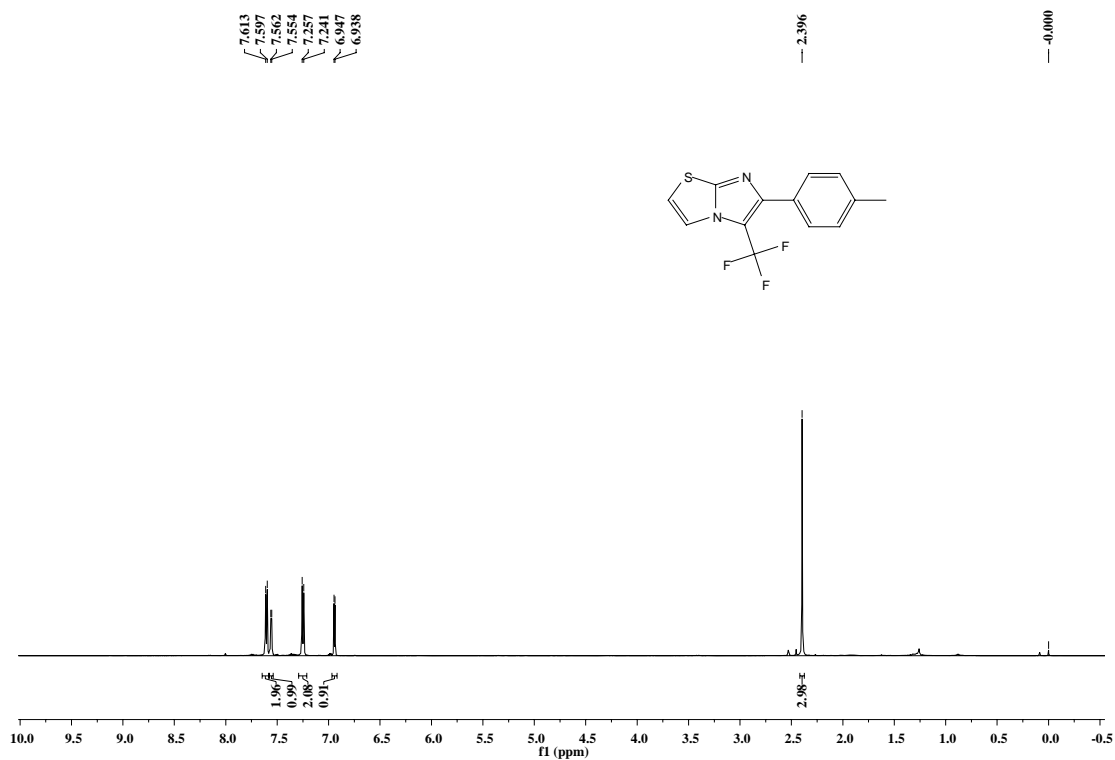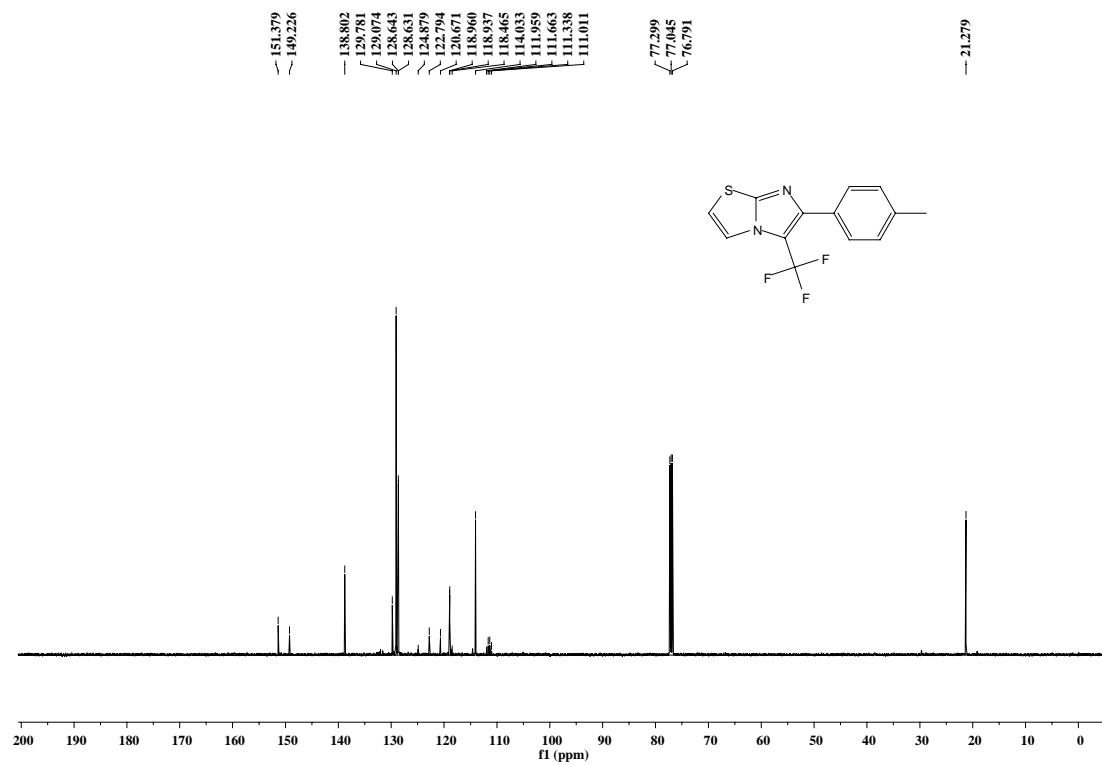

6-(4-methoxyphenyl)-5-(trifluoromethyl)imidazo[2,1-b]thiazole (2c)

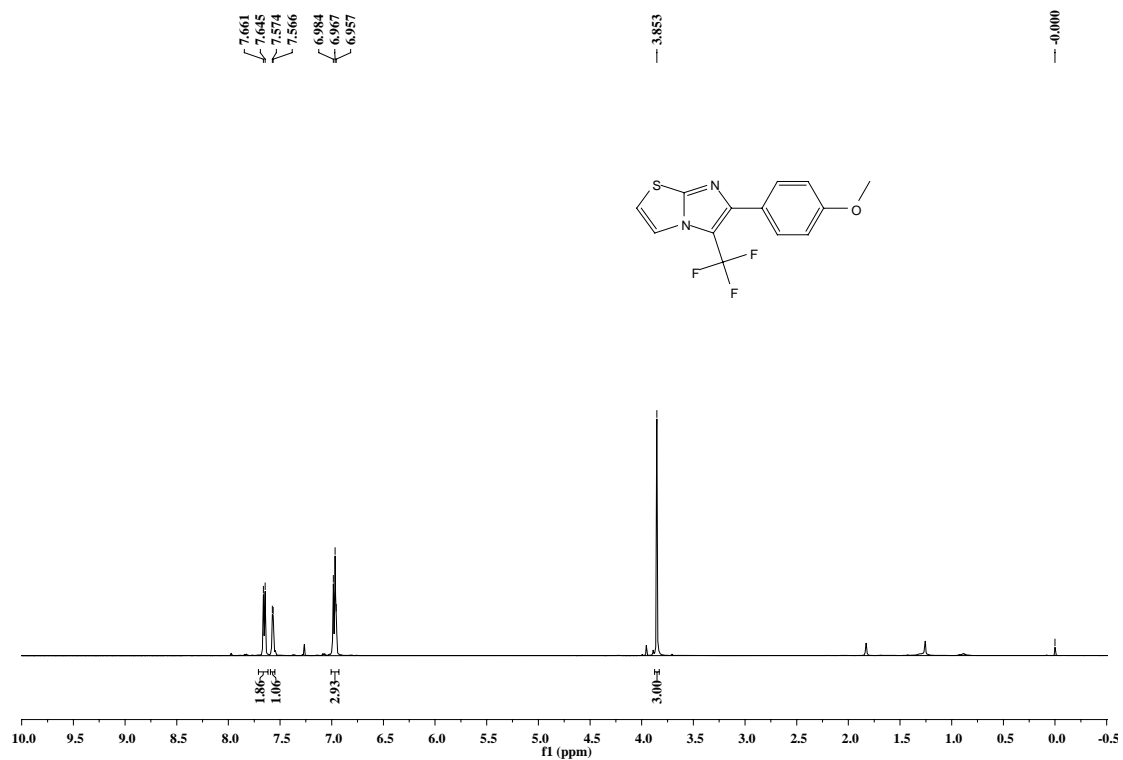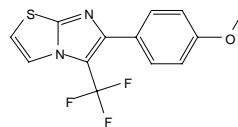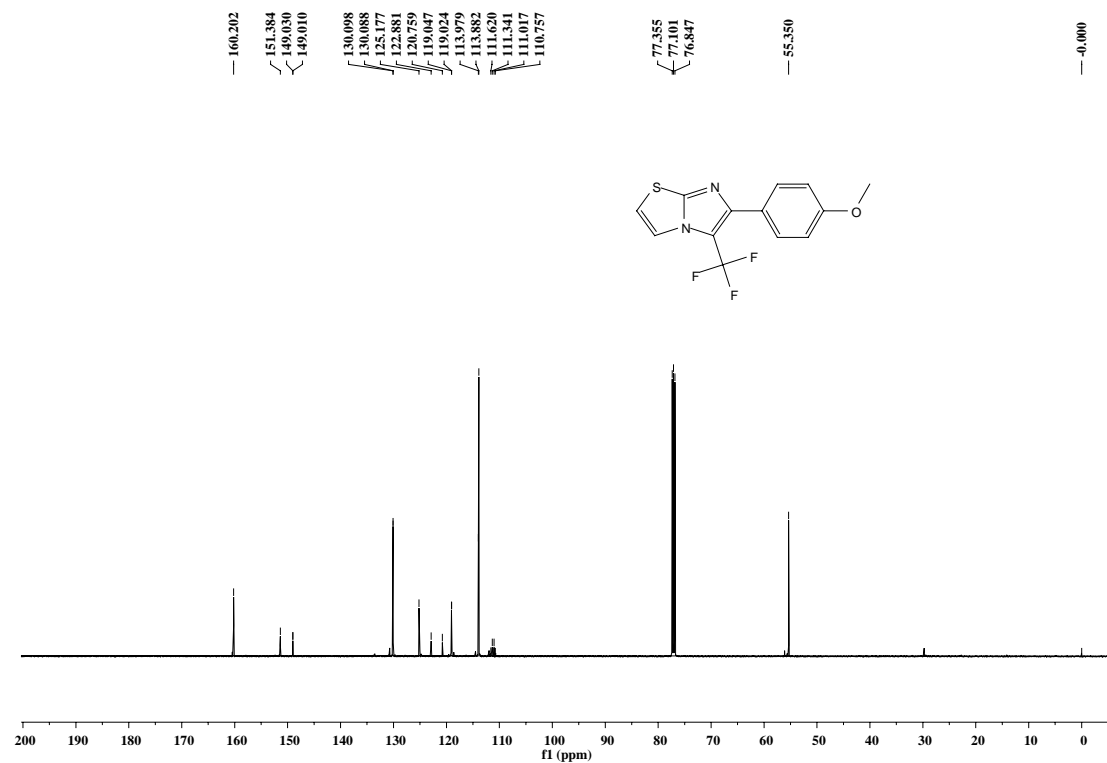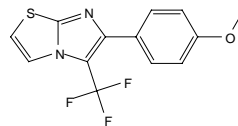

# 6-(4-chlorophenyl)-5-(trifluoromethyl)imidazo[2,1-b]thiazole (2d)

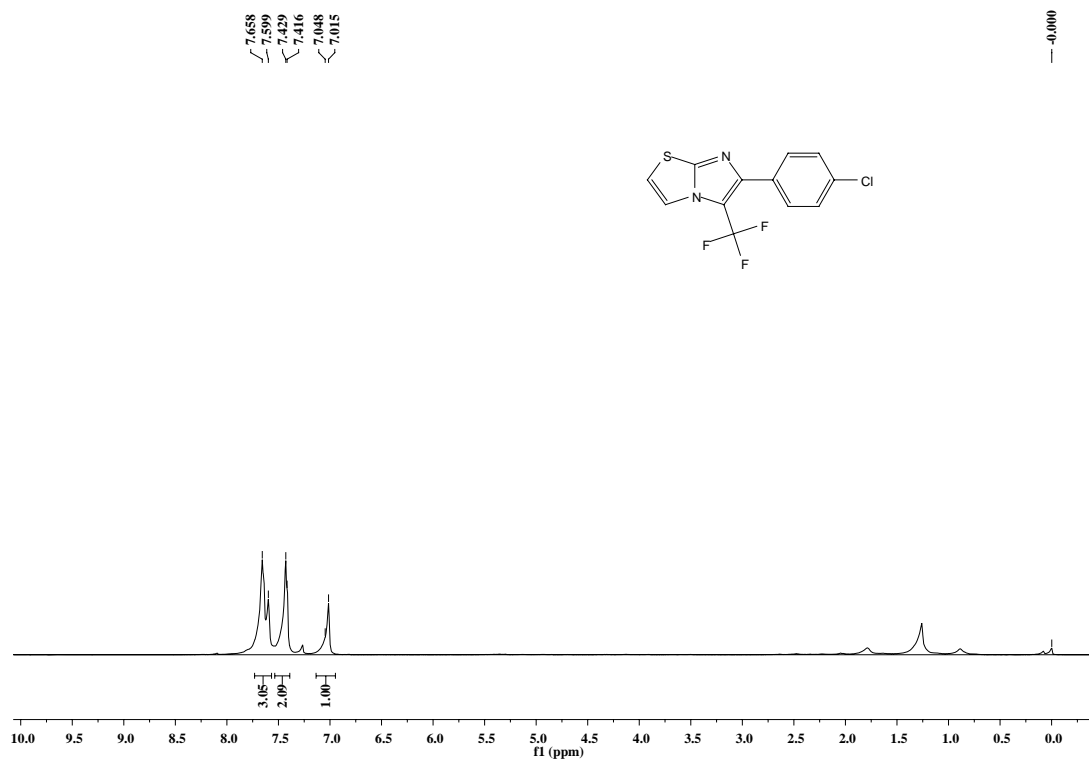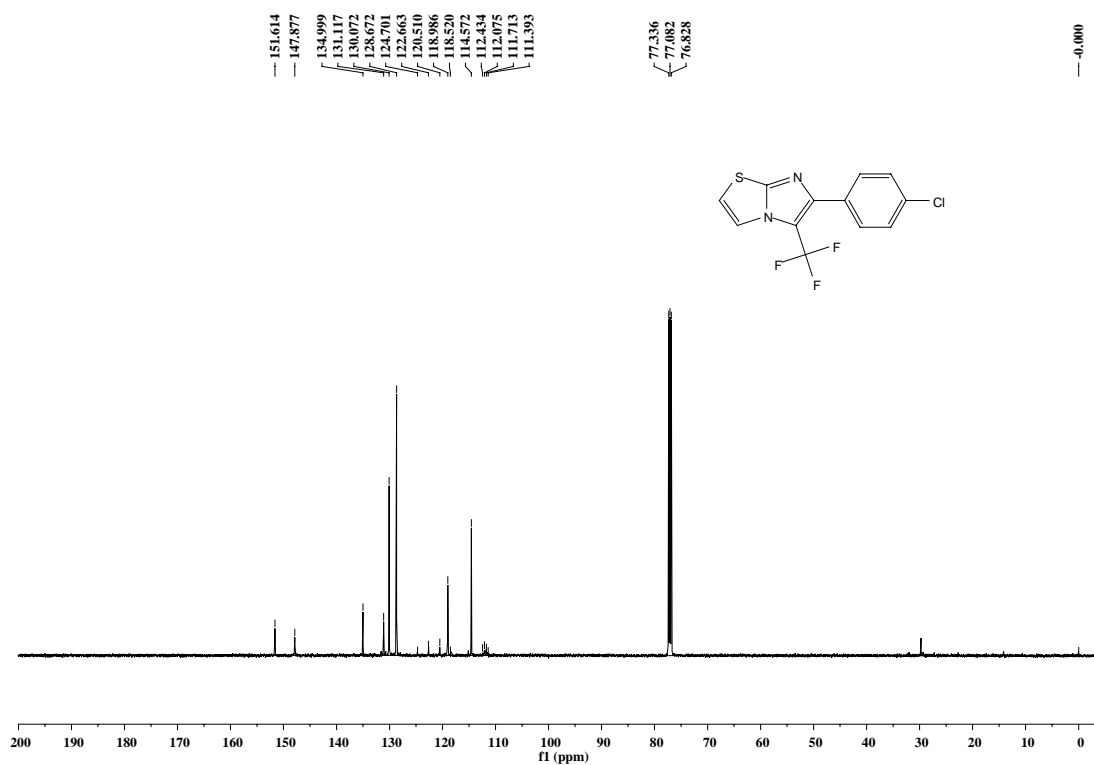

# 6-(4-bromophenyl)-5-(trifluoromethyl)imidazo[2,1-b]thiazole (2e)

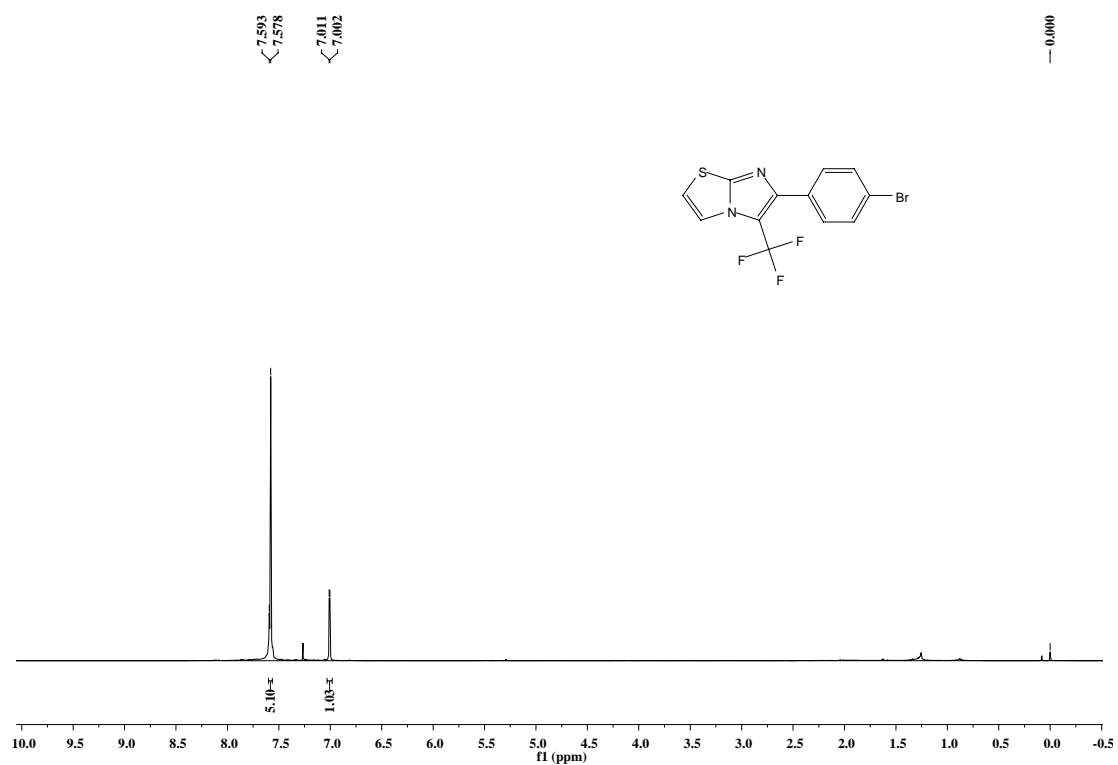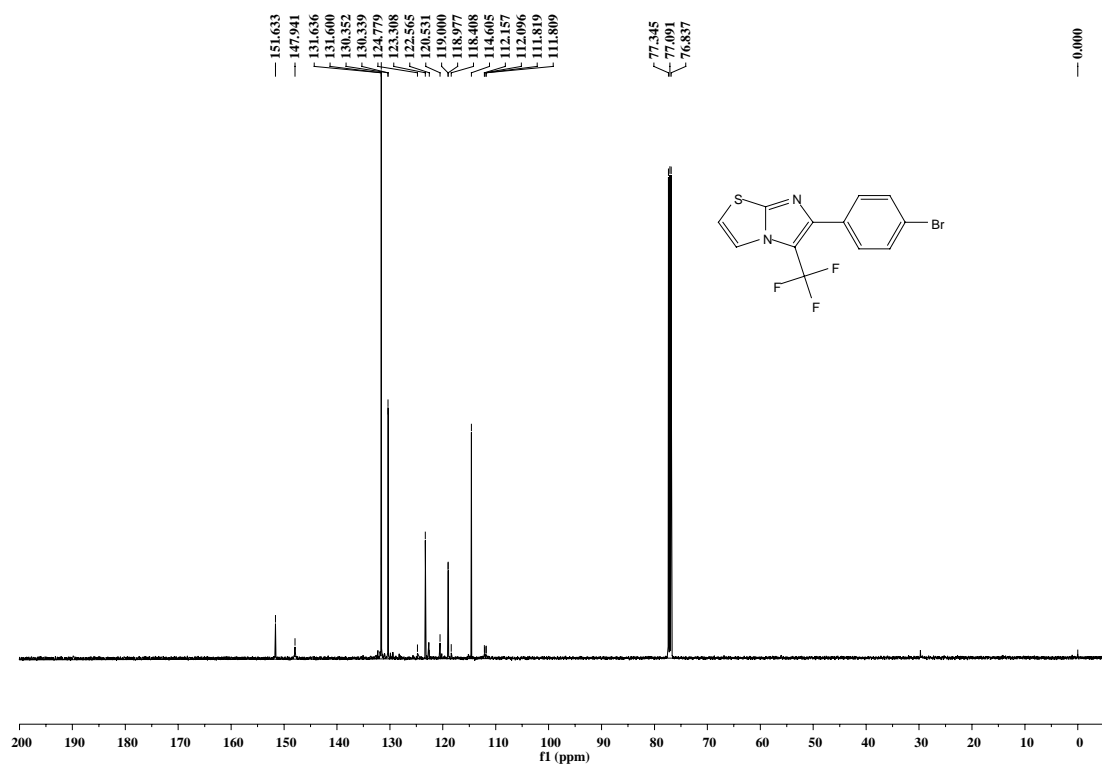

6-(4-fluorophenyl)-5-(trifluoromethyl)imidazo[2,1-b]thiazole (2f)

7.700  
7.689  
7.683  
7.672  
7.591  
7.582  
7.150  
7.133  
7.115  
7.003  
6.994

-0.000

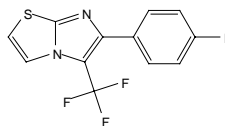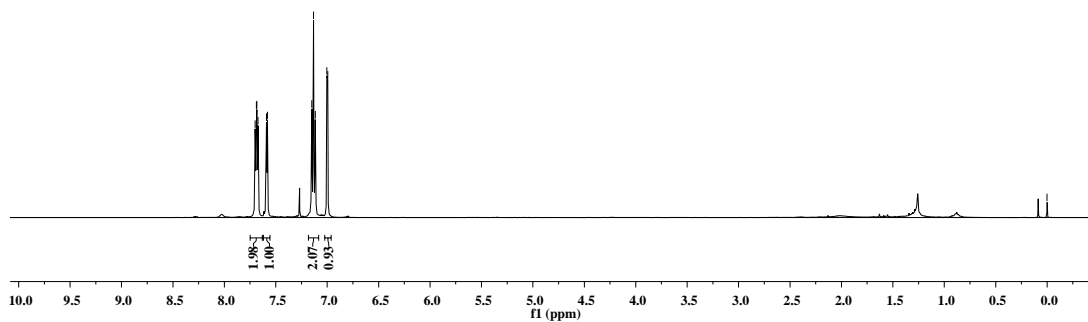

164.212  
162.235  
151.538  
148.107  
136.699  
136.687  
136.632  
136.620  
128.793  
128.767  
124.807  
122.684  
120.561  
118.976  
118.954  
118.438  
115.527  
115.354  
114.408  
112.241  
111.904  
111.573  
111.177

77.336  
77.082  
76.827

-0.000

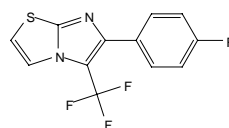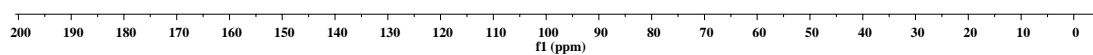

# 4-(5-(trifluoromethyl)imidazo[2,1-b]thiazol-6-yl)benzotrile (2g)

7.850  
7.835  
7.744  
7.729  
7.682  
7.144  
7.102

-0.000

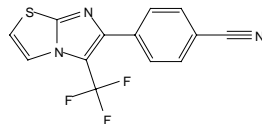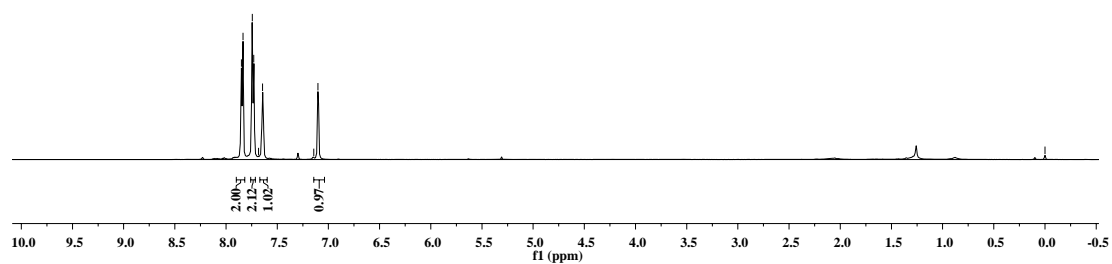

151.989  
146.834  
132.197  
129.356  
129.345  
124.540  
122.415  
120.289  
119.011  
118.989  
118.696  
118.164  
115.400  
113.157  
112.829  
112.501  
112.386  
112.173

77.439  
77.184  
76.930

-0.000

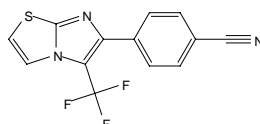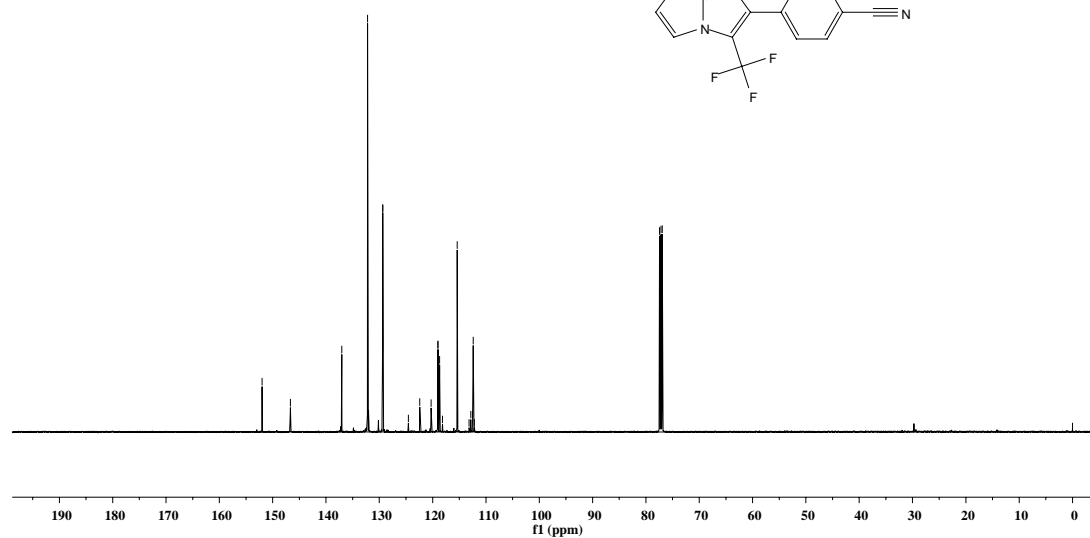



6-(3,4-difluorophenyl)-5-(trifluoromethyl)imidazo[2,1-b]thiazole (2h)

7.605  
7.575  
7.560  
7.455  
7.262  
7.239  
7.041

0.000

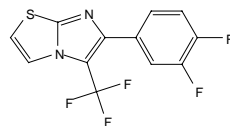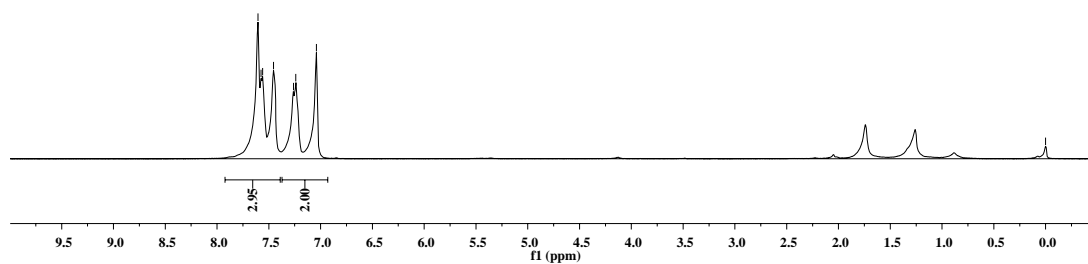

151.752  
151.711  
151.534  
151.160  
151.070  
149.813  
149.770  
149.201  
149.107  
148.771  
129.522  
124.981  
124.604  
122.448  
120.324  
118.907  
118.201  
117.964  
117.816  
117.325  
117.186  
114.709  
112.405  
112.131  
111.784  
111.461

77.246  
76.992  
76.738

-0.000

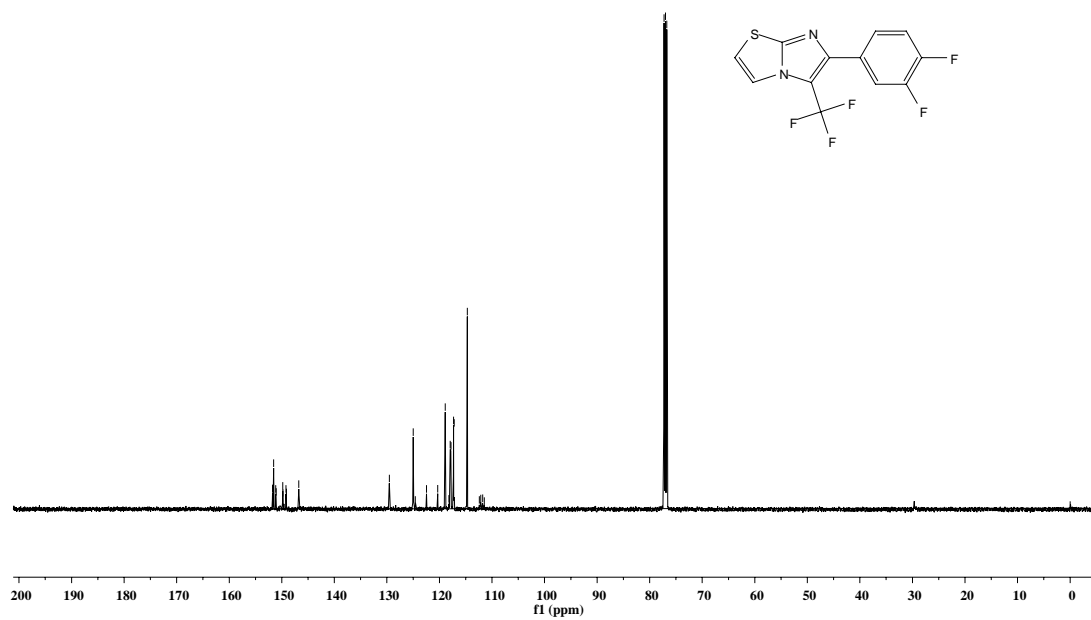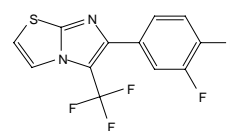

2-methyl-6-phenyl-5-(trifluoromethyl)imidazo[2,1-b]thiazole (2i)

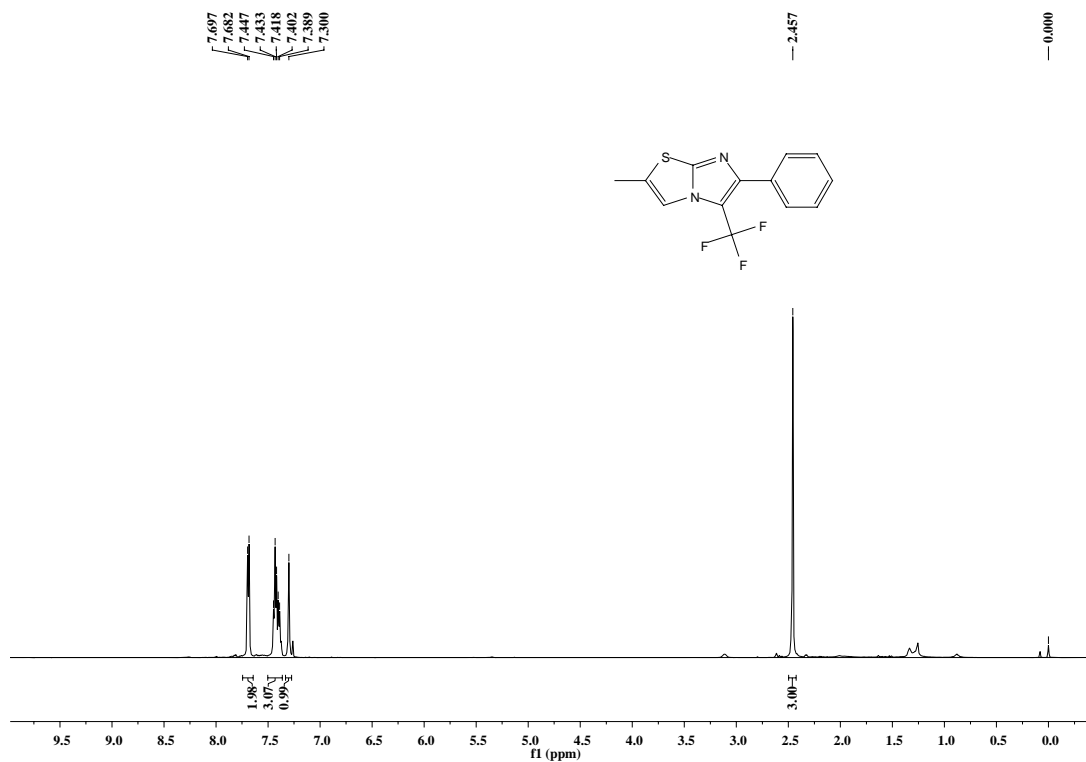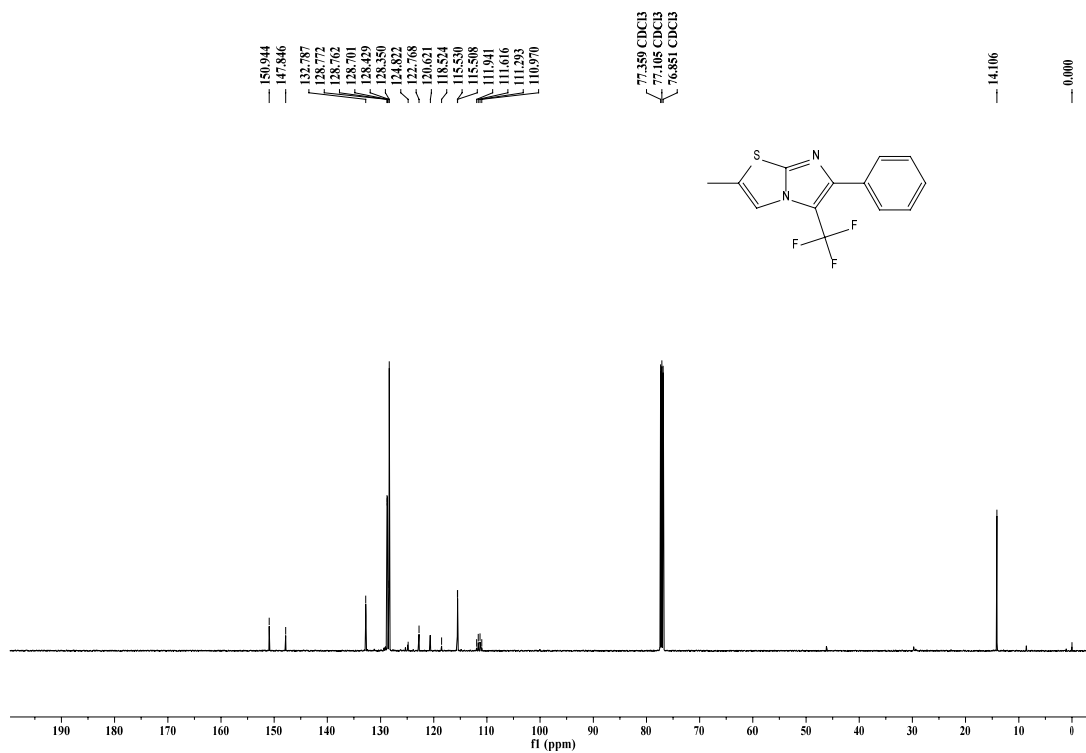

Ethyl 6-phenyl-5-(trifluoromethyl)imidazo[2,1-b]thiazole-2-carboxylate (2j)

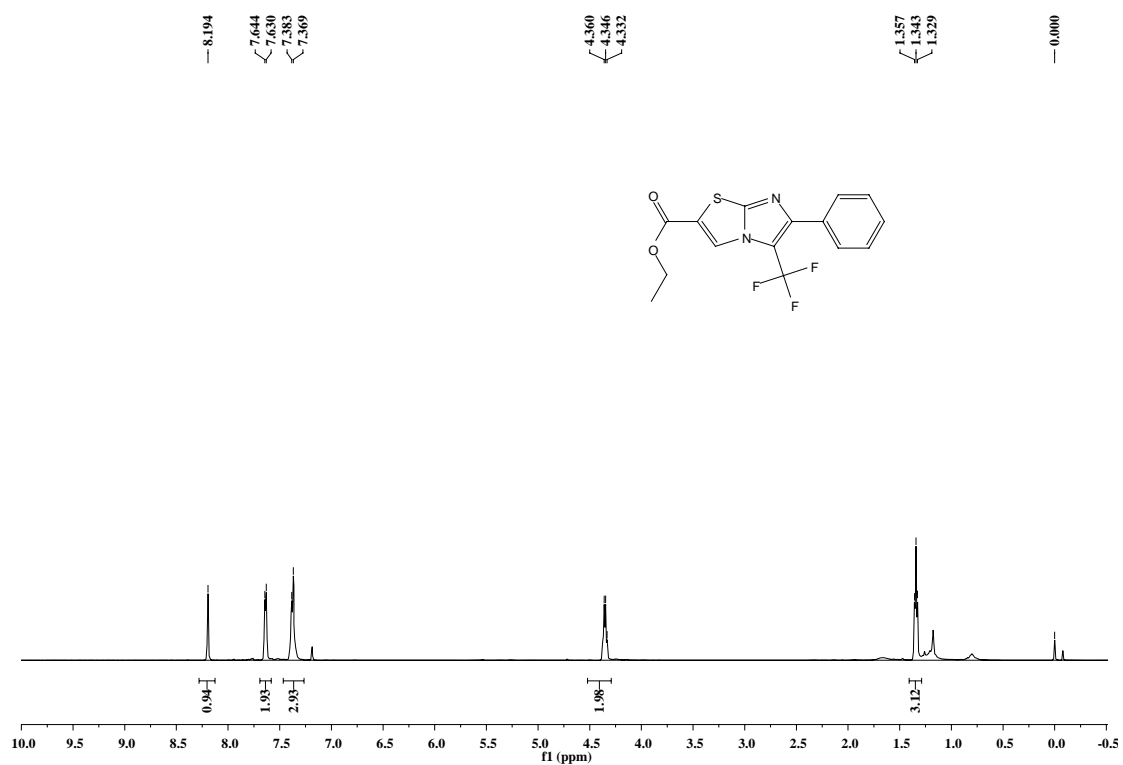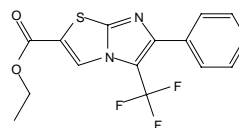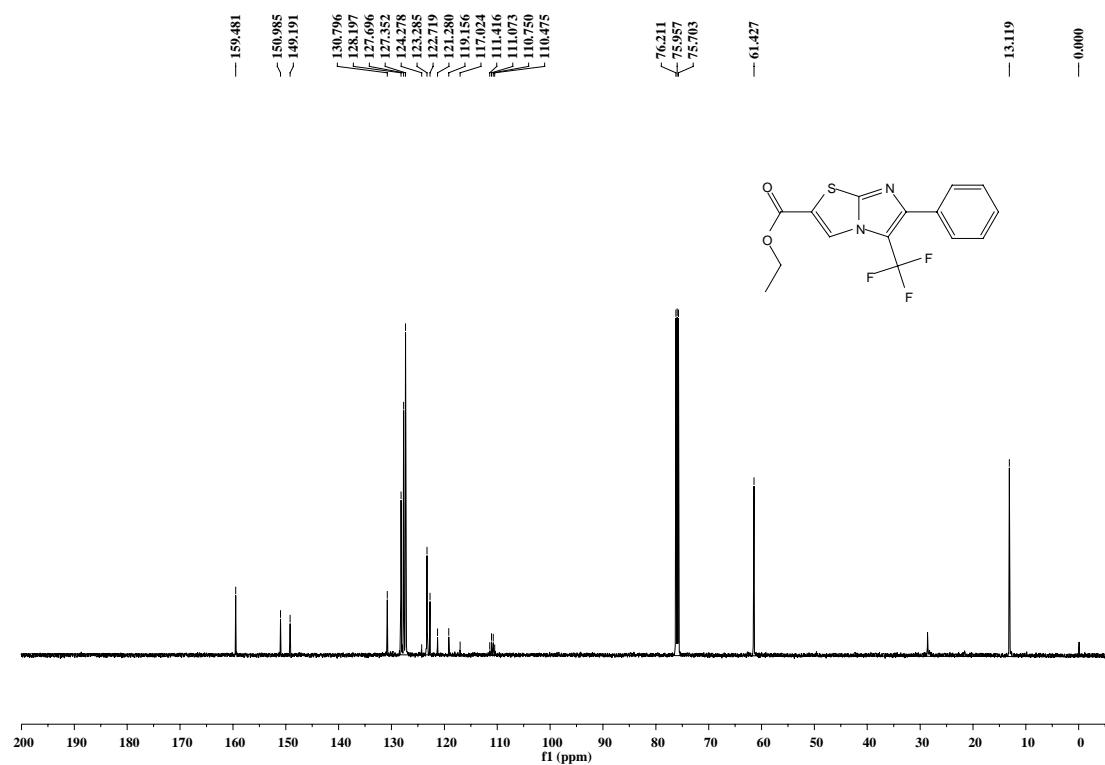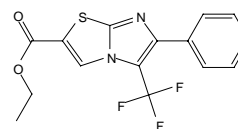

# 2-phenyl-3-(trifluoromethyl)benzo[d]imidazo[2,1-b]thiazole (2k)

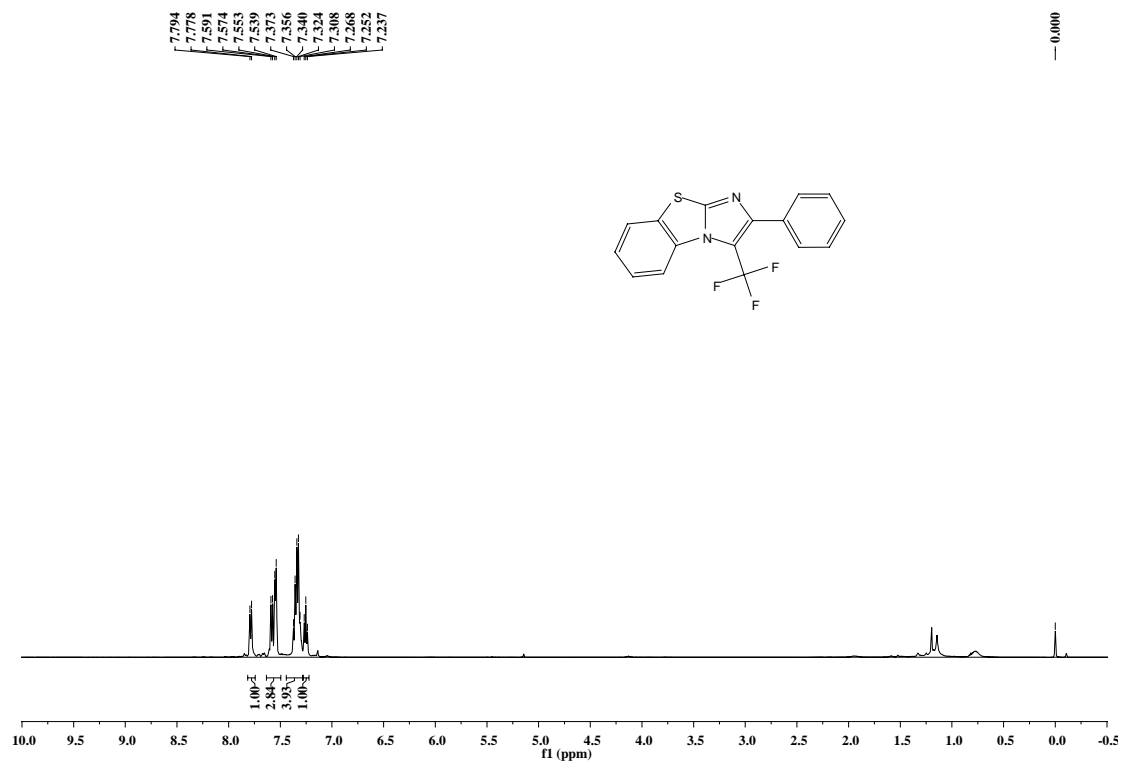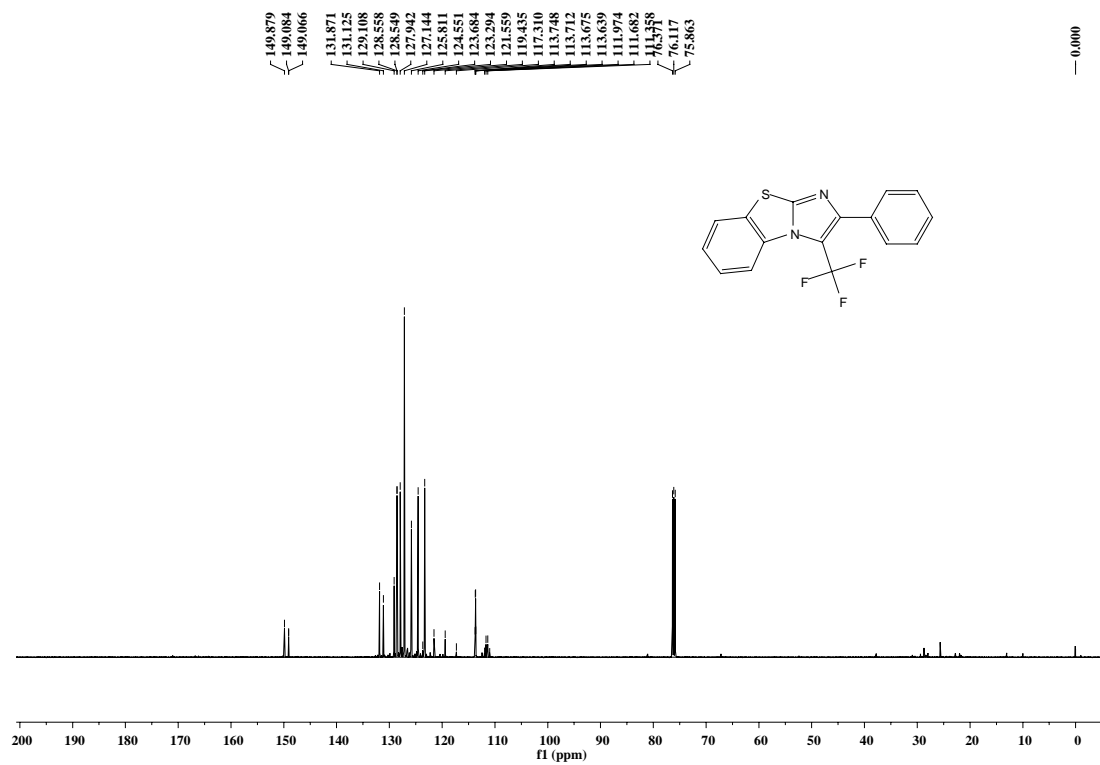

# 2-phenyl-3-(trifluoromethyl)imidazo[1,2-a]pyridine (2l)

8.436  
8.174  
8.168  
7.606  
7.595  
7.546  
7.331  
7.224  
6.835  
6.823  
6.810

0.000

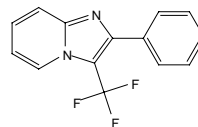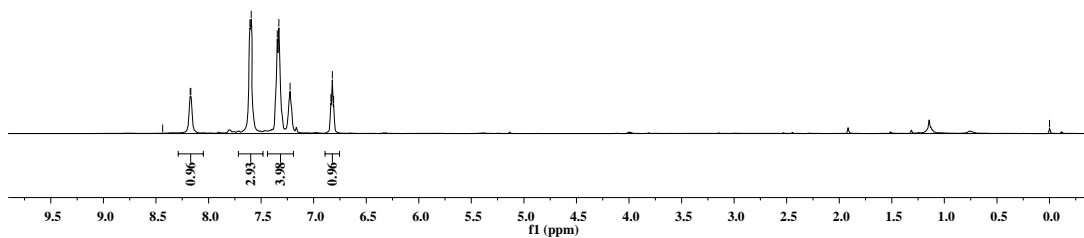

147.038  
145.116  
131.877  
128.524  
127.913  
127.145  
125.922  
124.452  
124.078  
121.991  
121.933  
119.867  
117.817  
116.962  
112.909  
108.690  
108.383

76.362  
76.107  
75.852

0.000

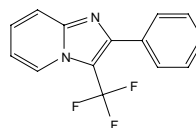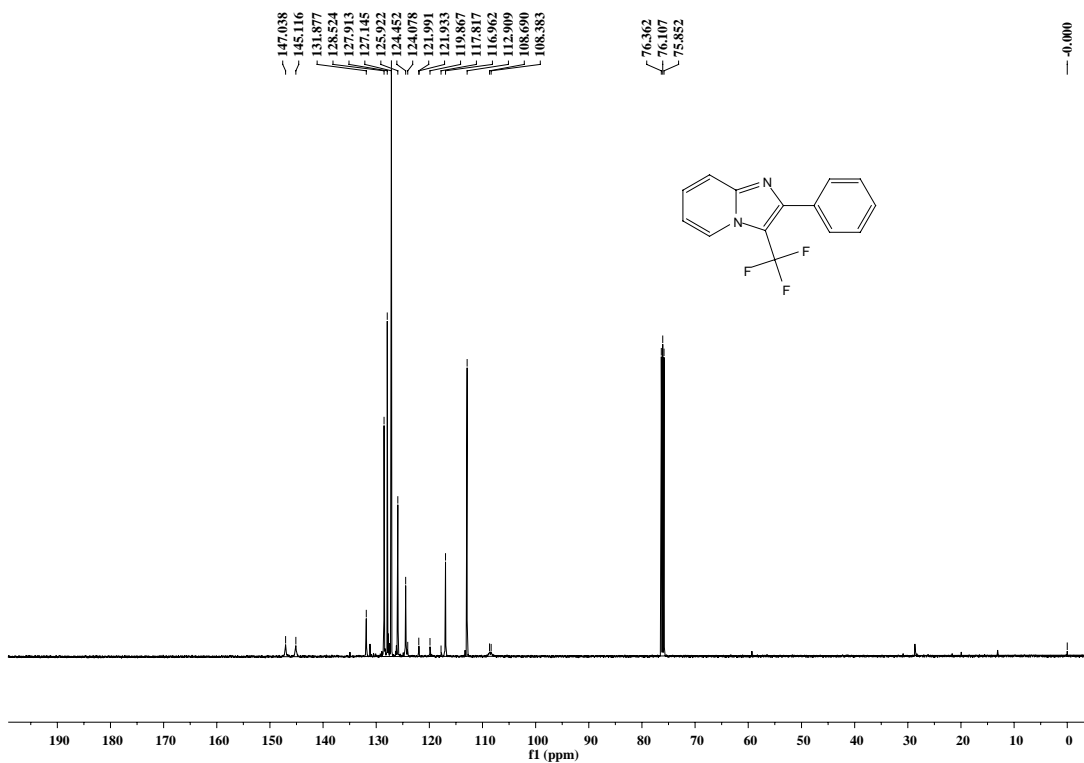

2-(*p*-tolyl)-3-(trifluoromethyl)imidazo[1,2-*a*]pyridine (2m)

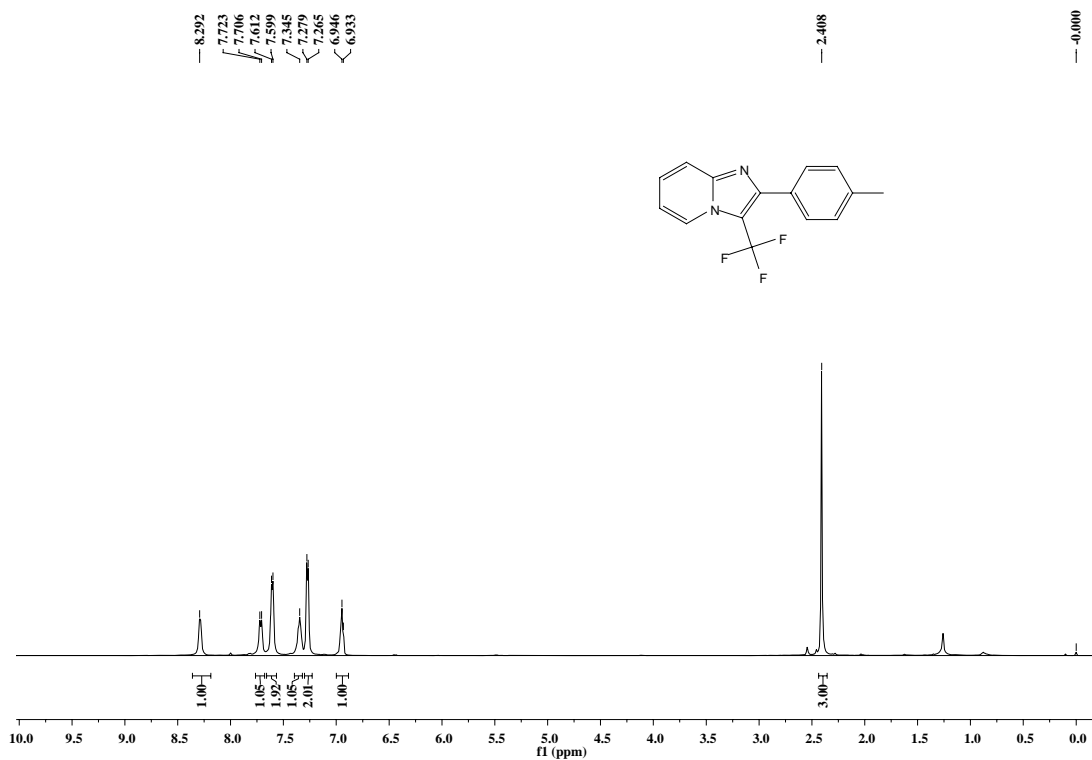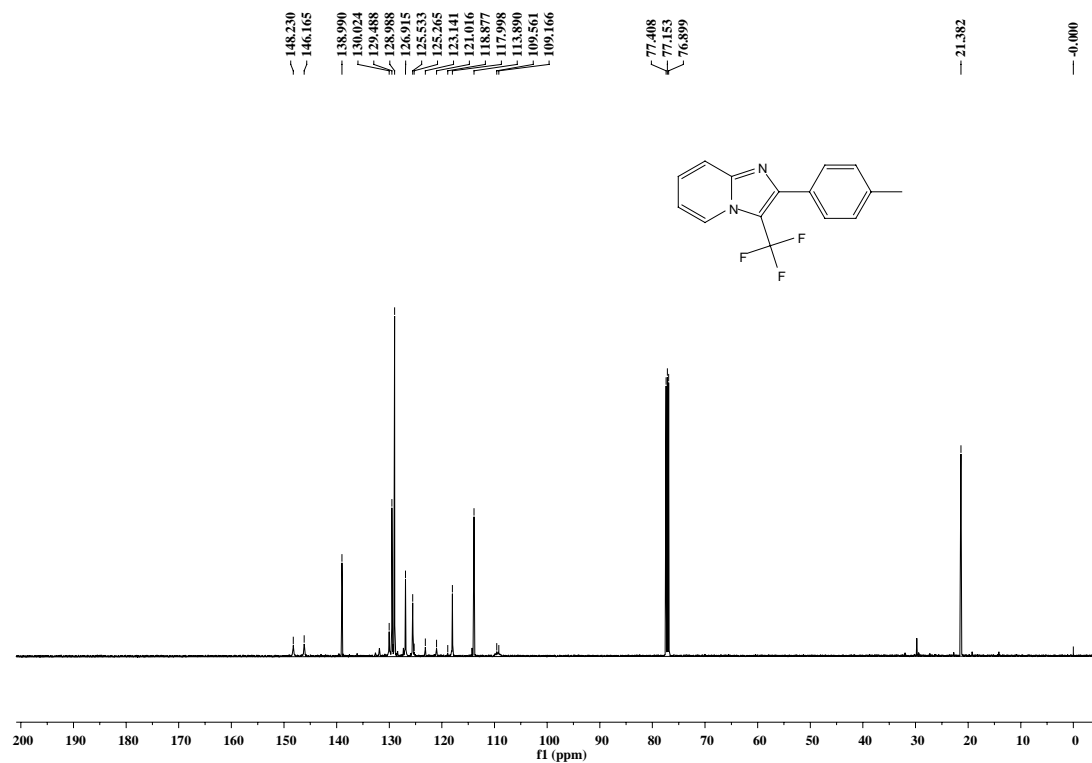

# 2-(3-methoxyphenyl)-3-(trifluoromethyl)imidazo[1,2-a]pyridine (2n)

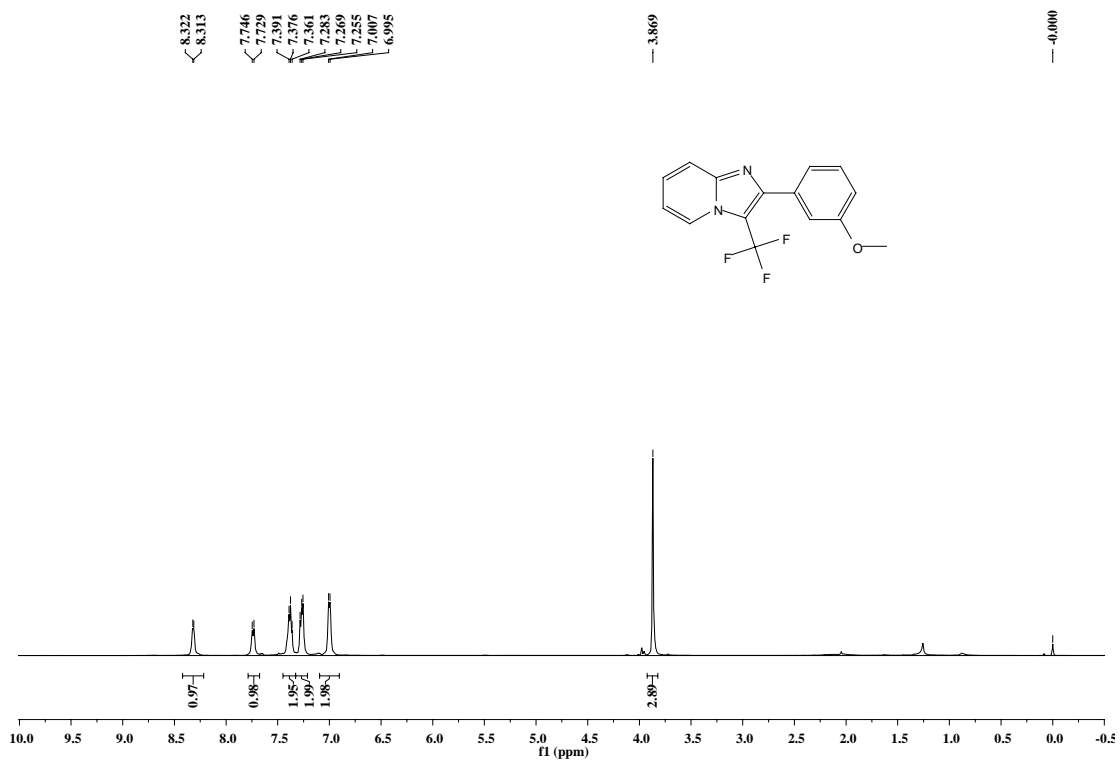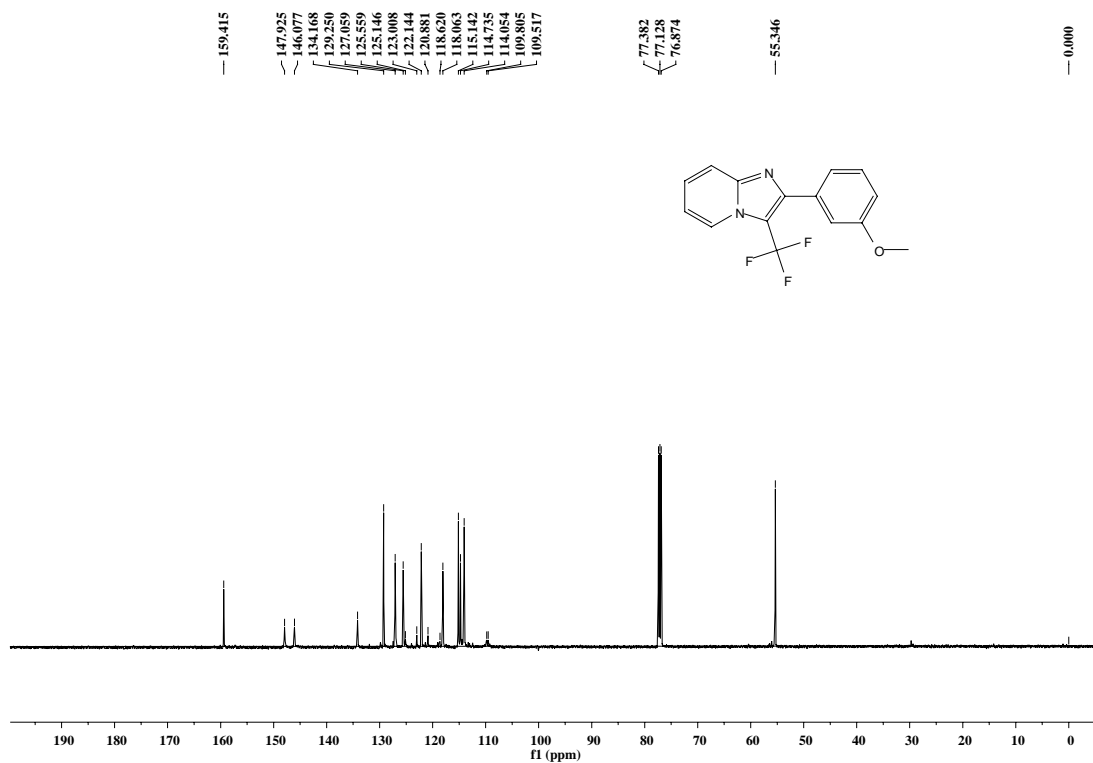

# 2-(4-chlorophenyl)-3-(trifluoromethyl)imidazo[1,2-a]pyridine (2o)

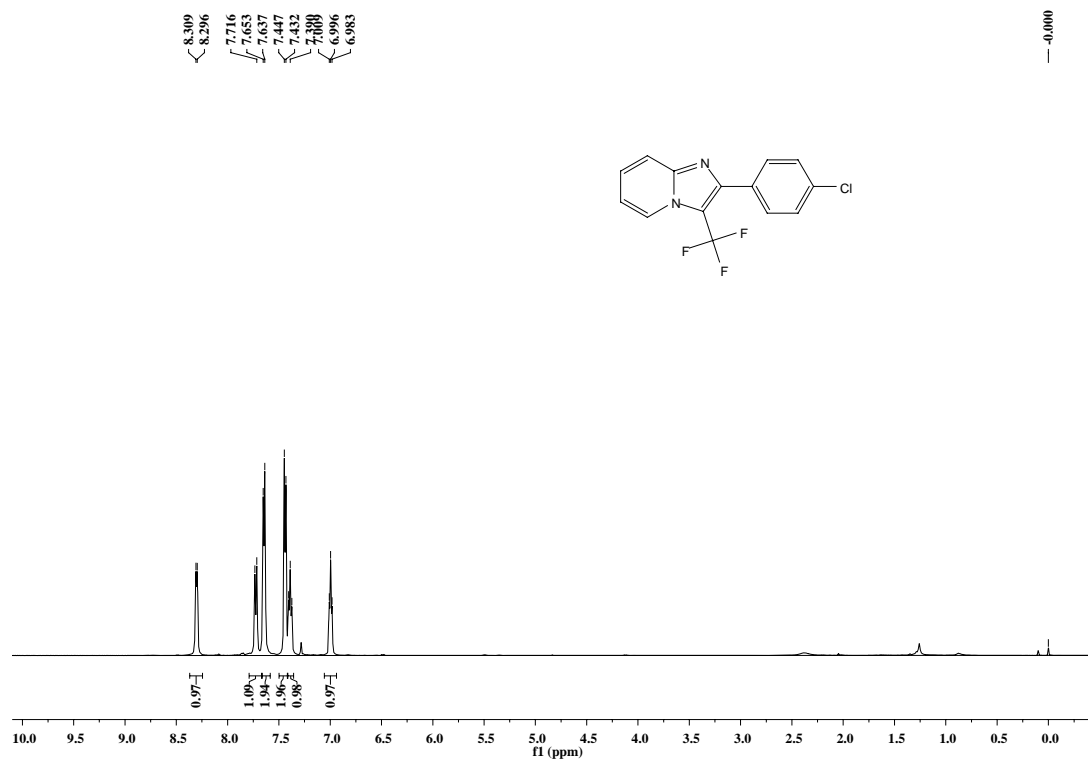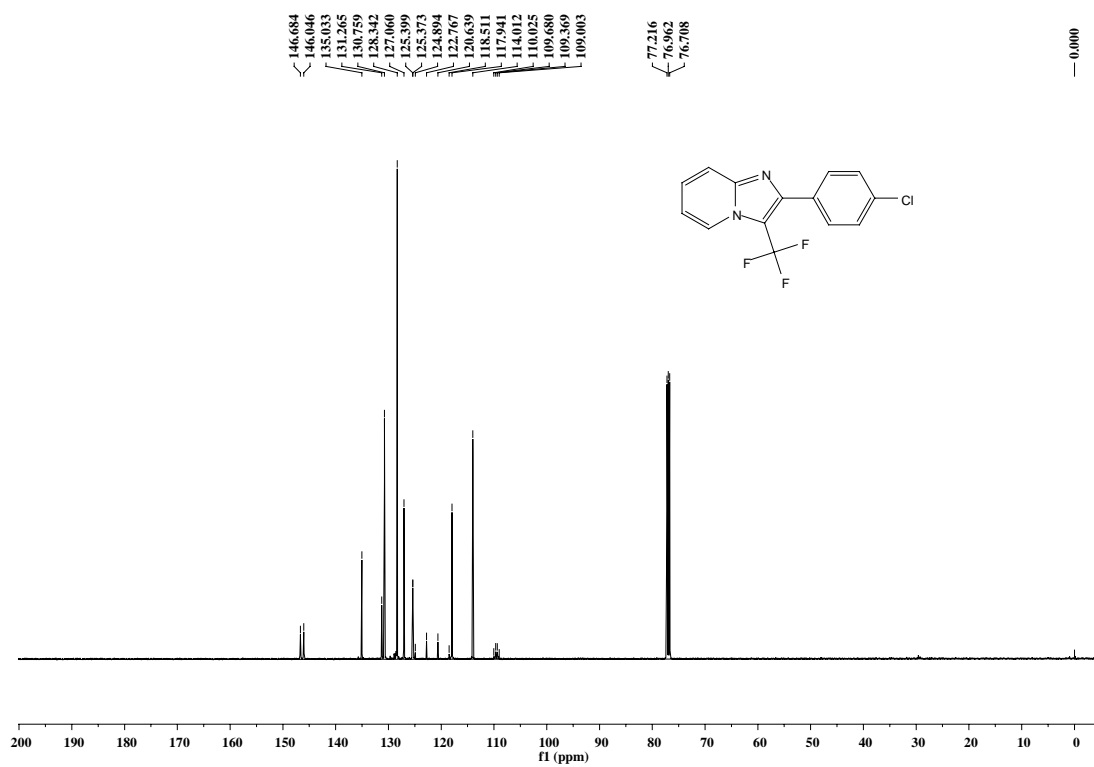



# 2-(4-bromophenyl)-3-(trifluoromethyl)imidazo[1,2-a]pyridine (2p)

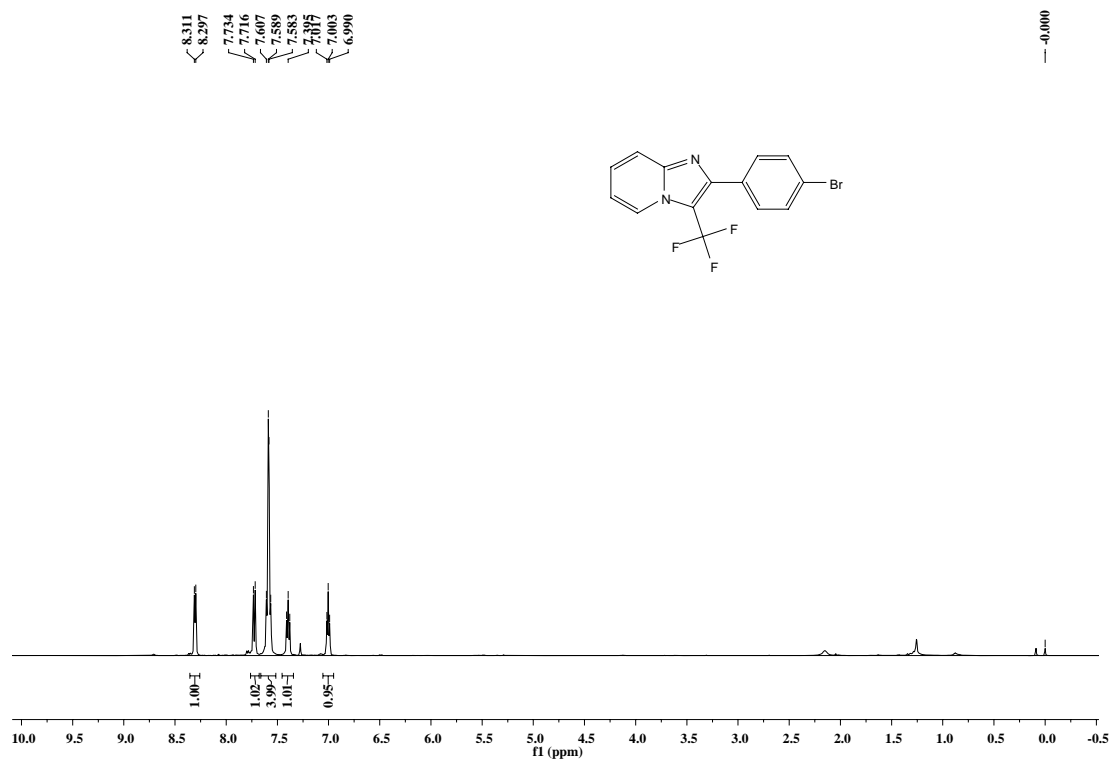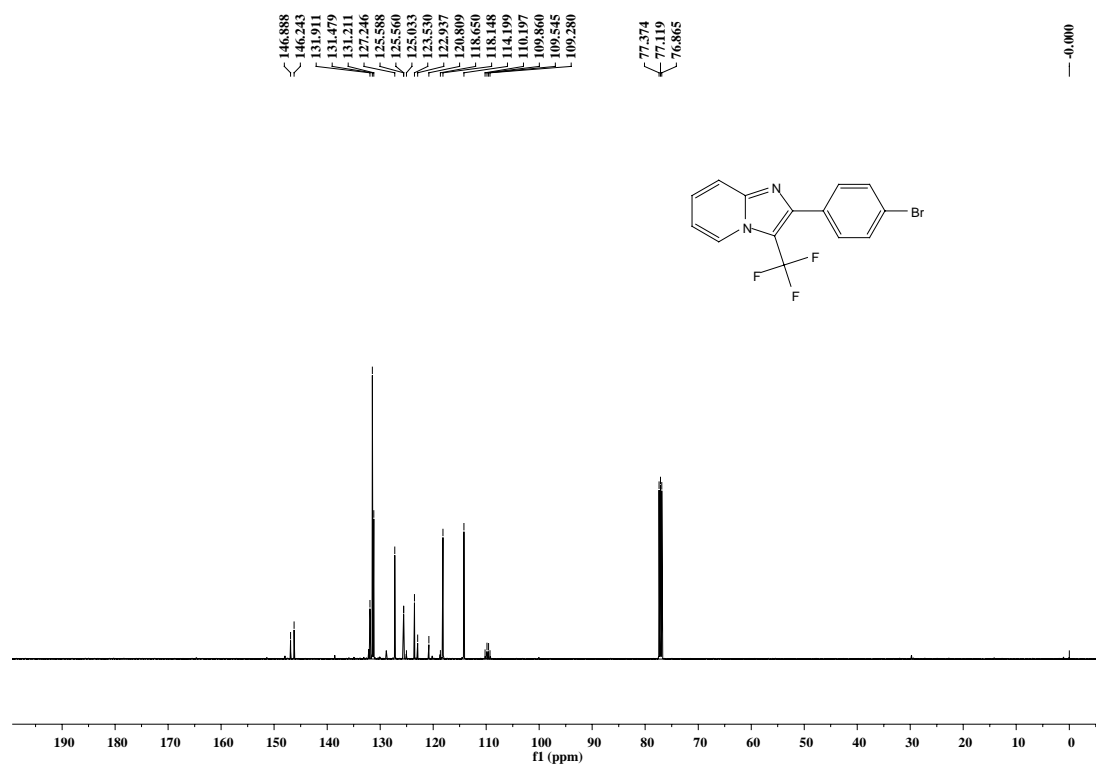

2-([1,1'-biphenyl]-4-yl)-3-(trifluoromethyl)imidazo[1,2-a]pyridine (2q)

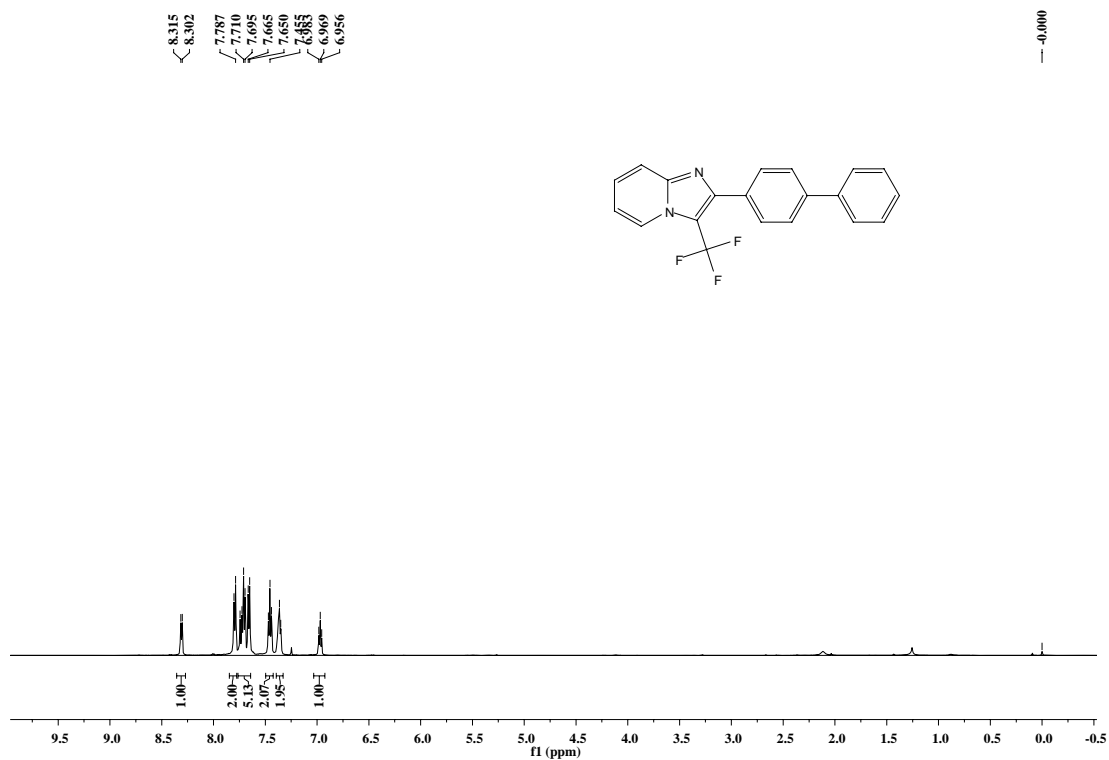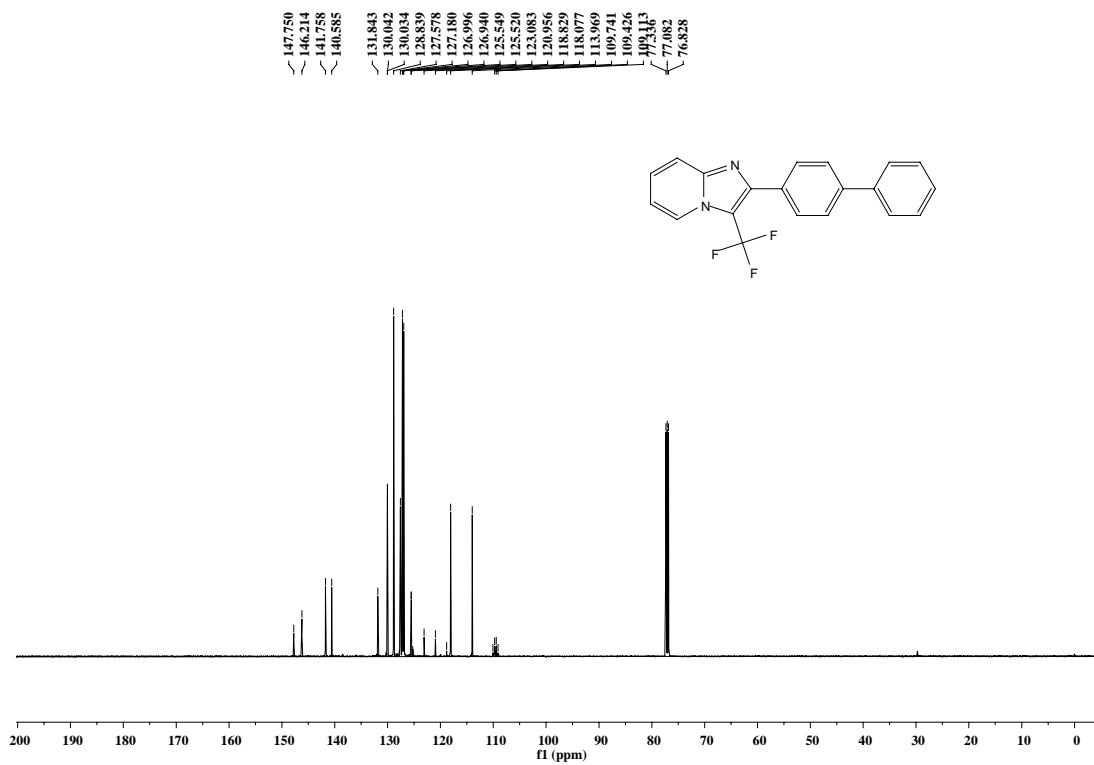

### 2-(naphthalen-2-yl)-3-(trifluoromethyl)imidazo[1,2-a]pyridine (2r)

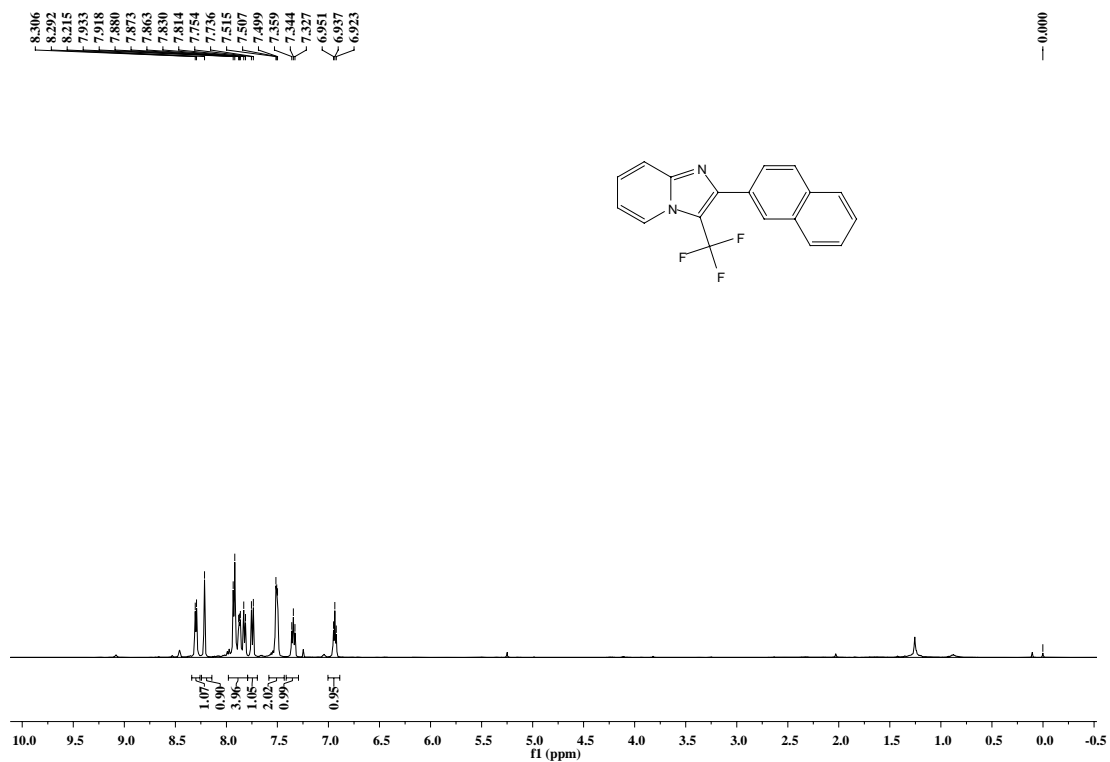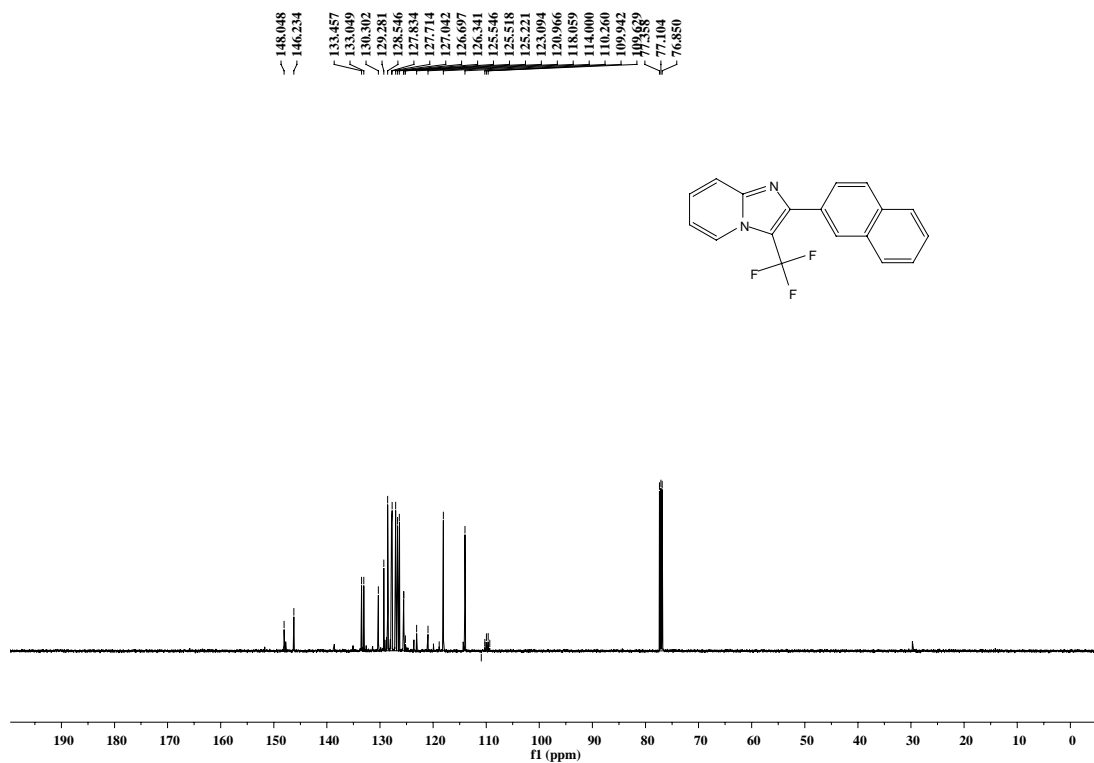

# 6-methyl-2-phenyl-3-(trifluoromethyl)imidazo[1,2-a]pyridine (2s)

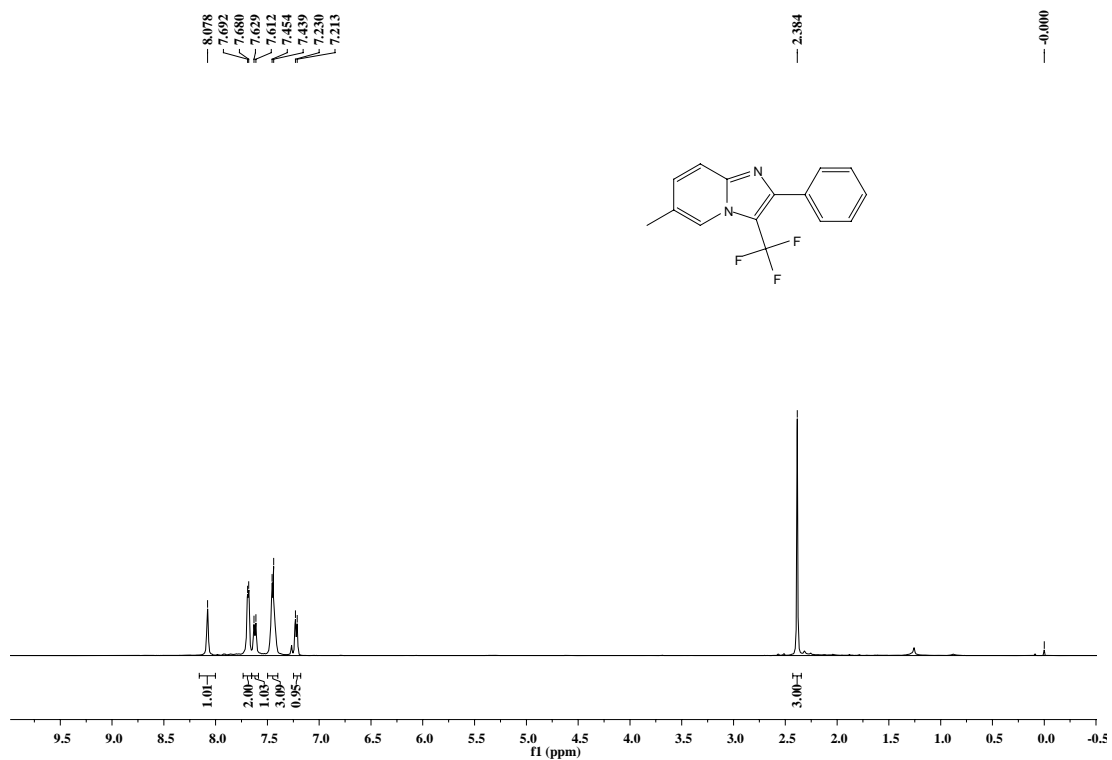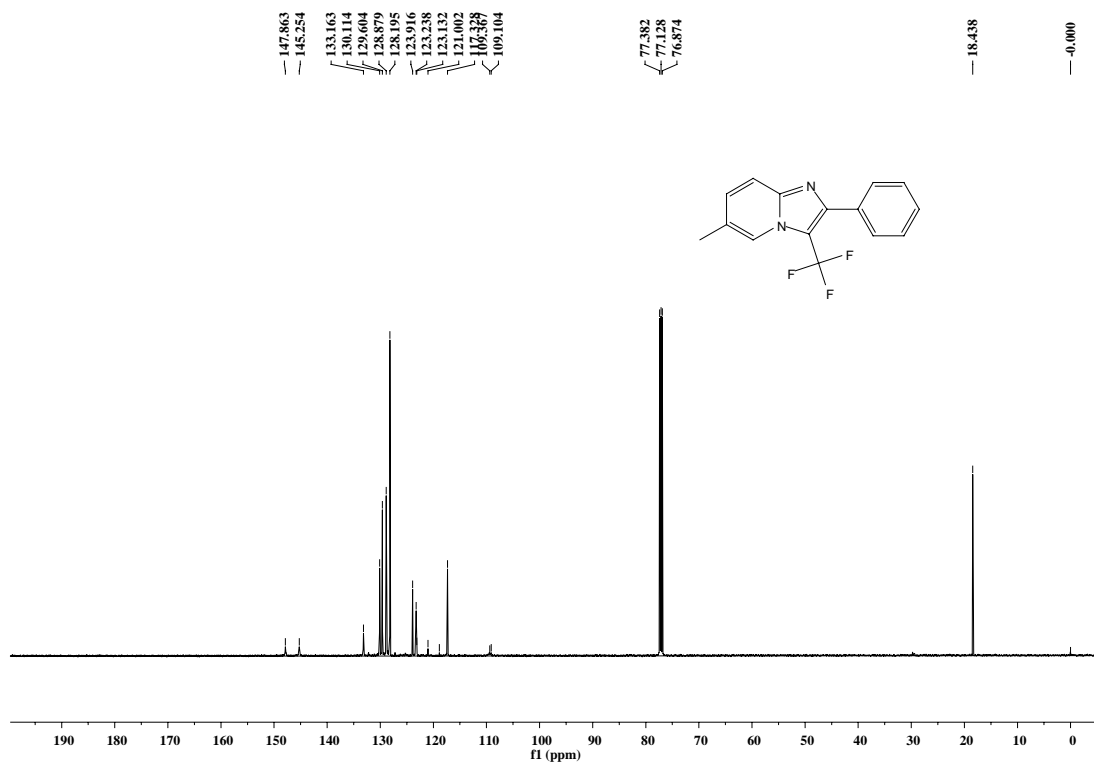

# 6-fluoro-2-phenyl-3-(trifluoromethyl)imidazo[1,2-a]pyridine (2t)

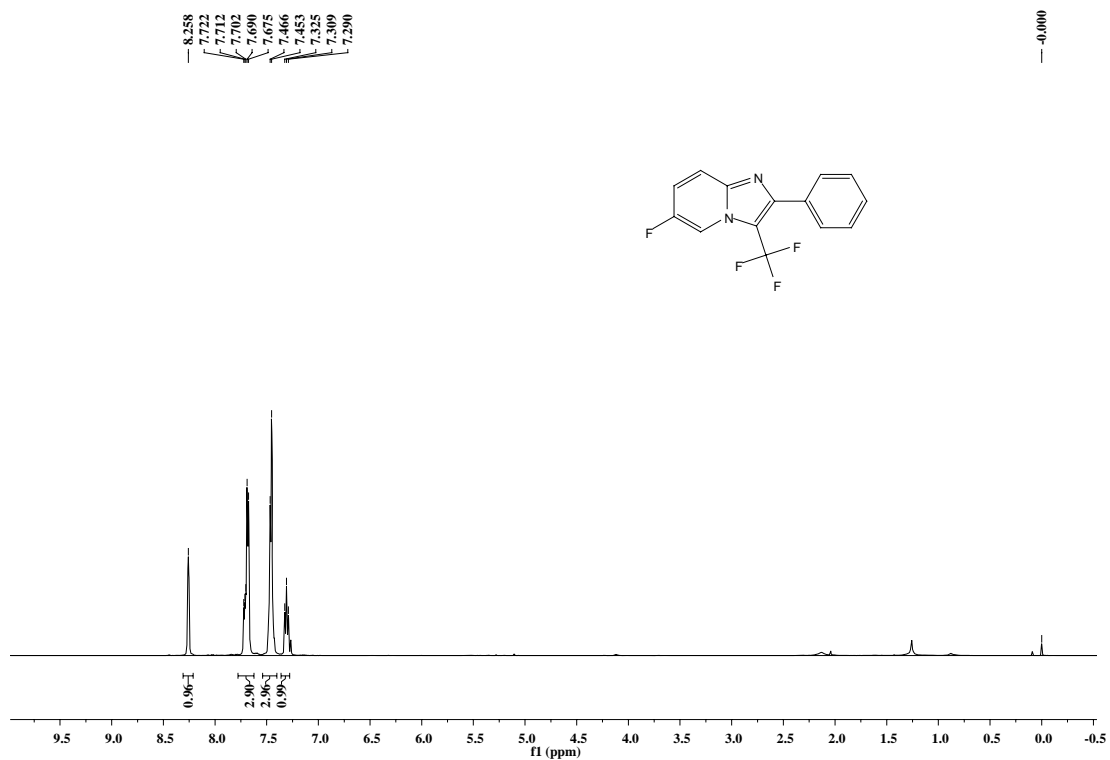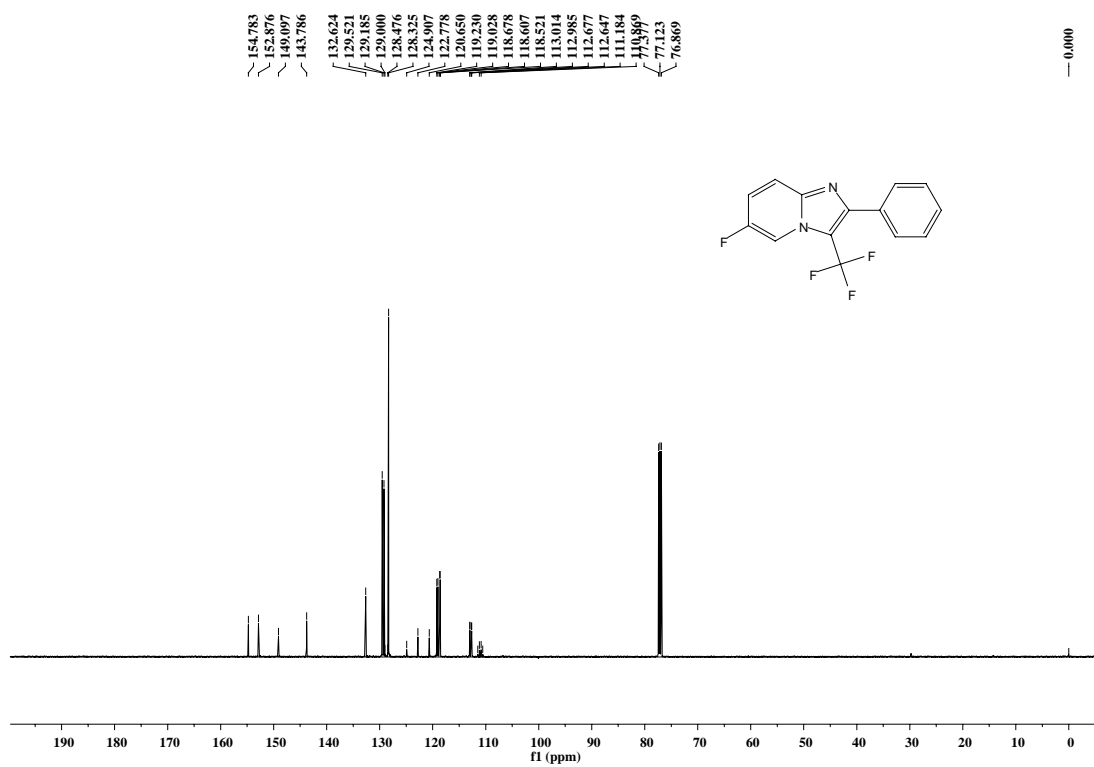

# 8-chloro-2-phenyl-3-(trifluoromethyl)imidazo[1,2-a]pyridine (2u)

8.169  
8.155  
7.627  
7.615  
7.419  
7.367  
6.869  
6.855  
6.840

-0.000

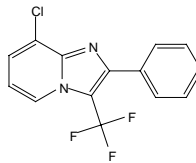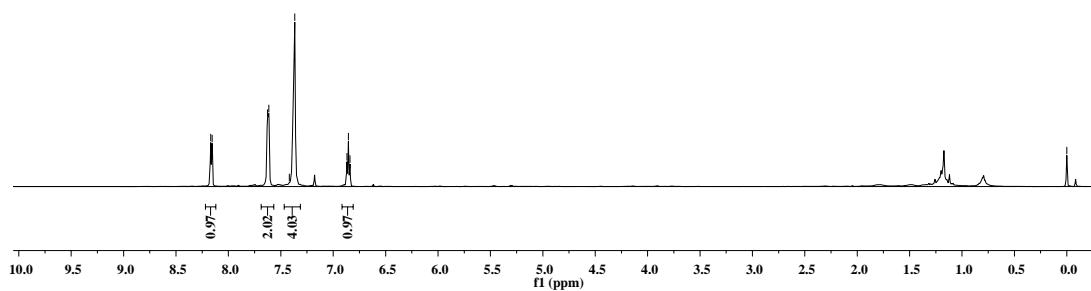

147.470  
143.591  
131.347  
128.743  
128.149  
127.542  
127.165  
124.879  
123.683  
123.131  
123.102  
122.997  
121.553  
119.422  
117.292  
112.600  
110.705  
110.390  
110.360  
110.073  
109.759  
76.278  
76.024  
75.769

-0.000

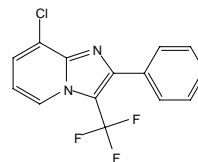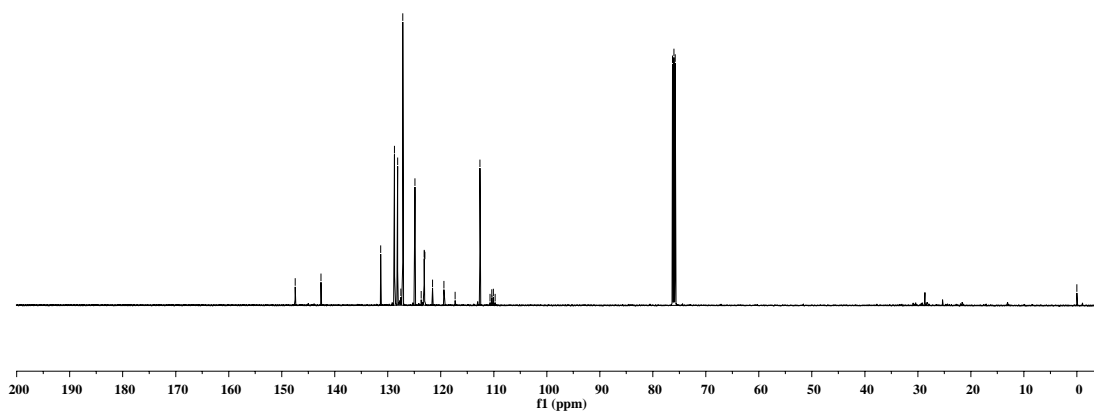

# 8-bromo-2-phenyl-3-(trifluoromethyl)imidazo[1,2-a]pyridine (2v)

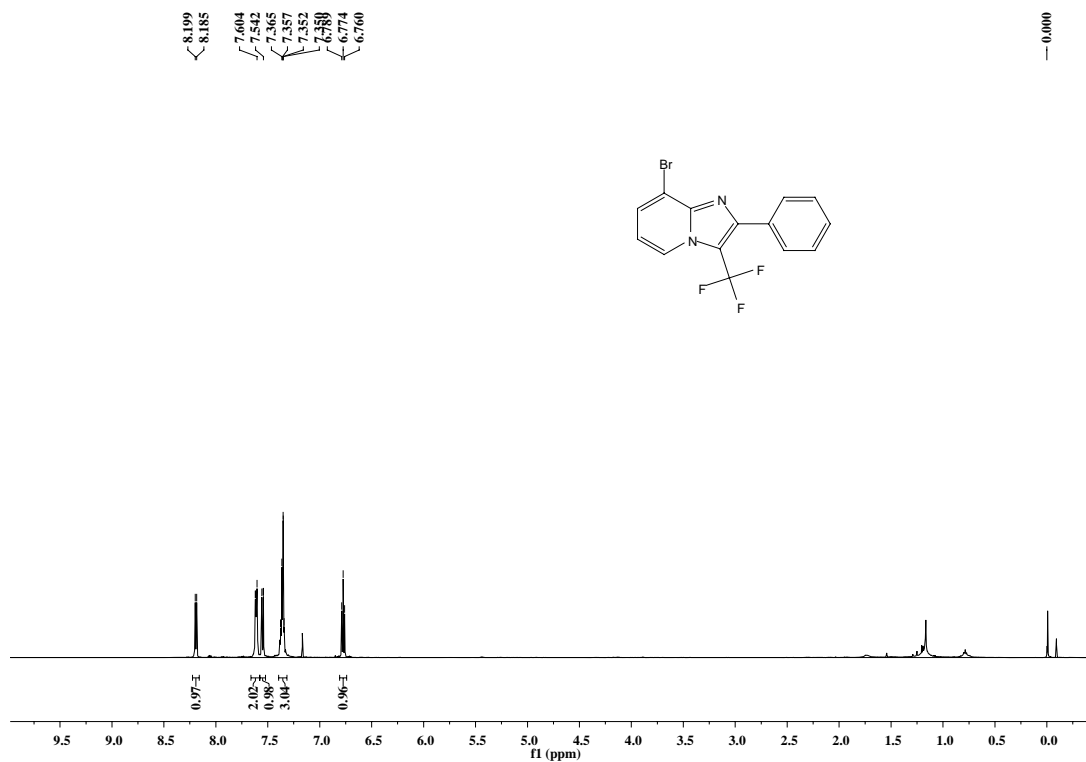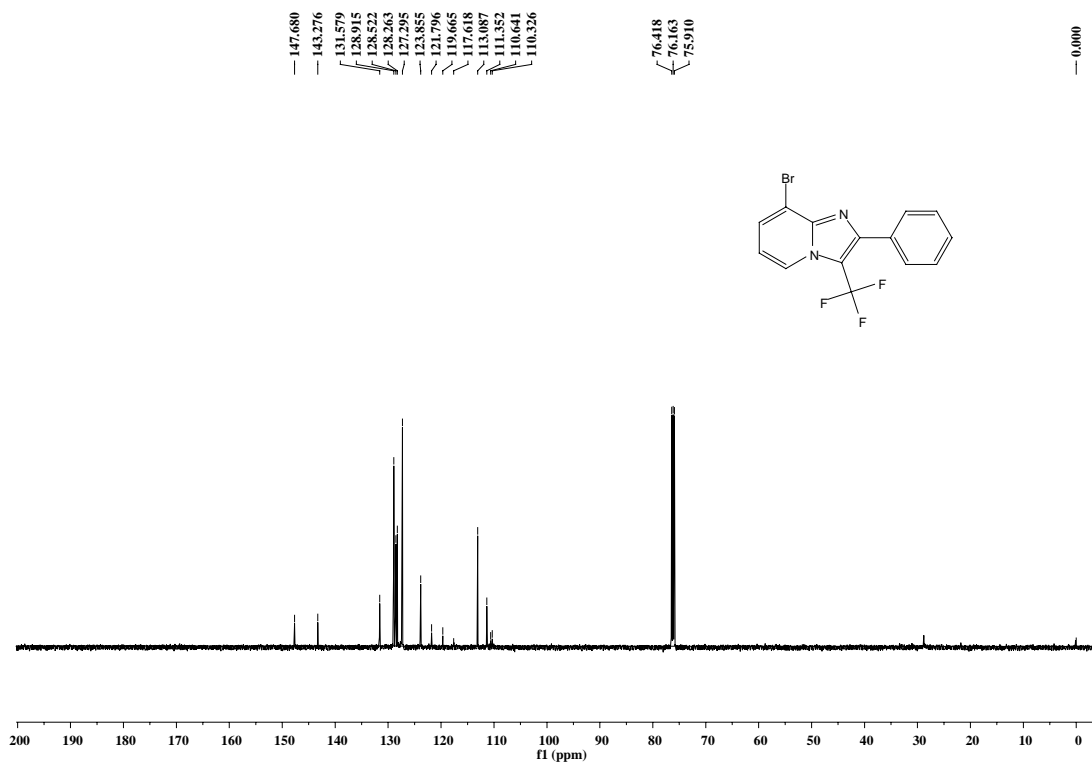

### 2-ethyl-3-(trifluoromethyl)imidazo[1,2-a]pyridine (2w)

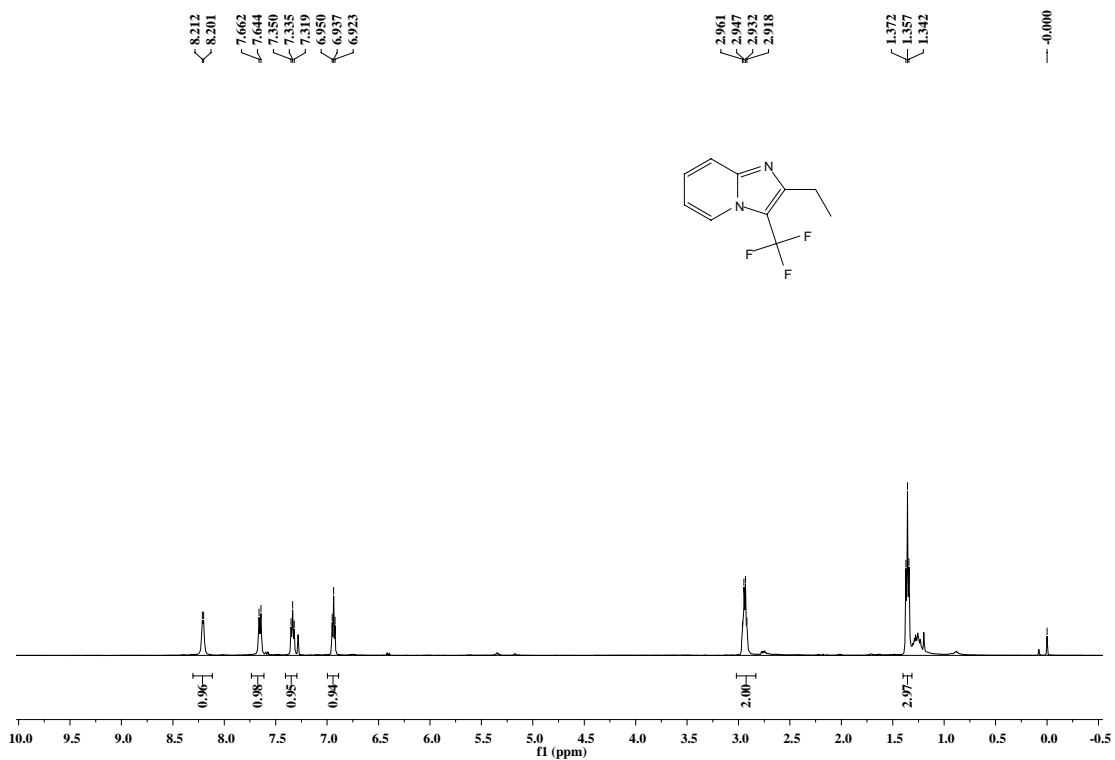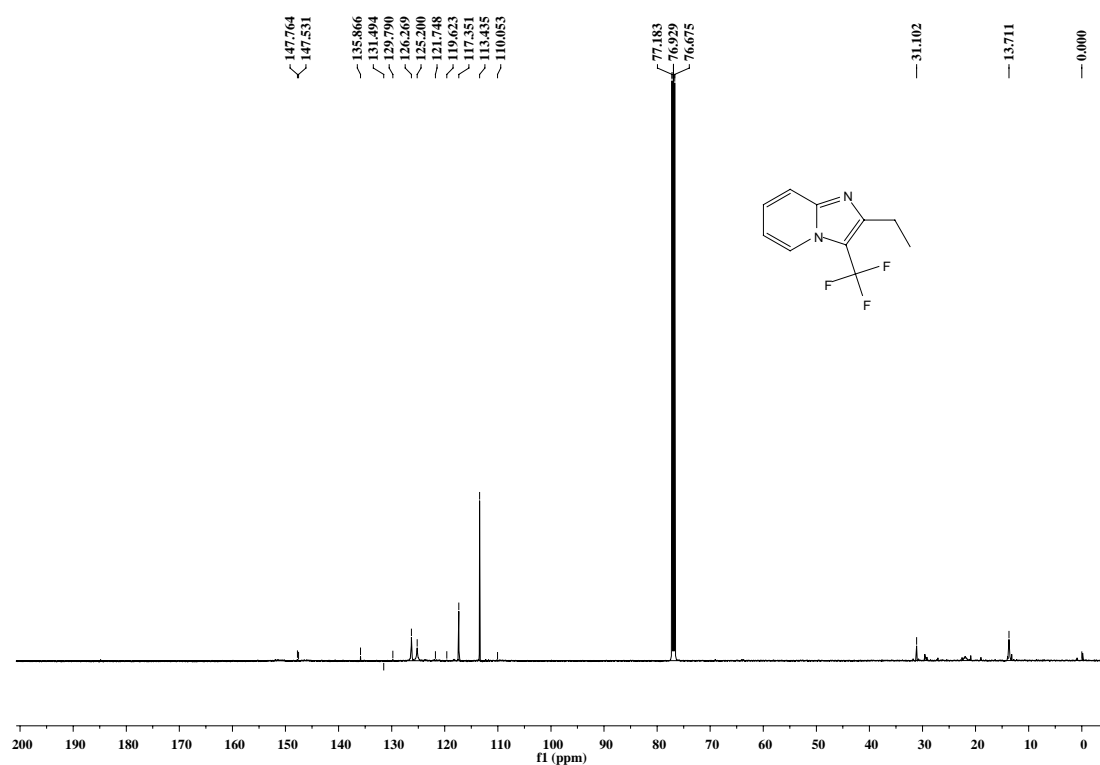



# 2-phenyl-3-(trifluoromethyl)imidazo[1,2-a]pyrimidine (2x)

8.735  
8.647  
8.636  
7.788  
7.780  
7.545  
7.474  
7.388  
7.128  
7.099

-0.000

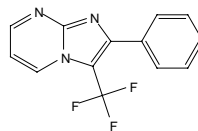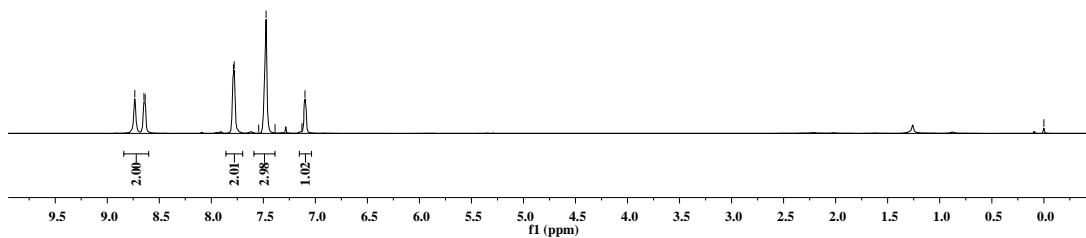

152.240  
149.457  
148.617  
133.455  
132.059  
129.648  
129.460  
128.277  
124.720  
122.582  
120.451  
118.323  
110.192  
108.533  
108.258  
107.921  
107.683

77.382  
77.128  
76.873

-0.000

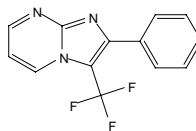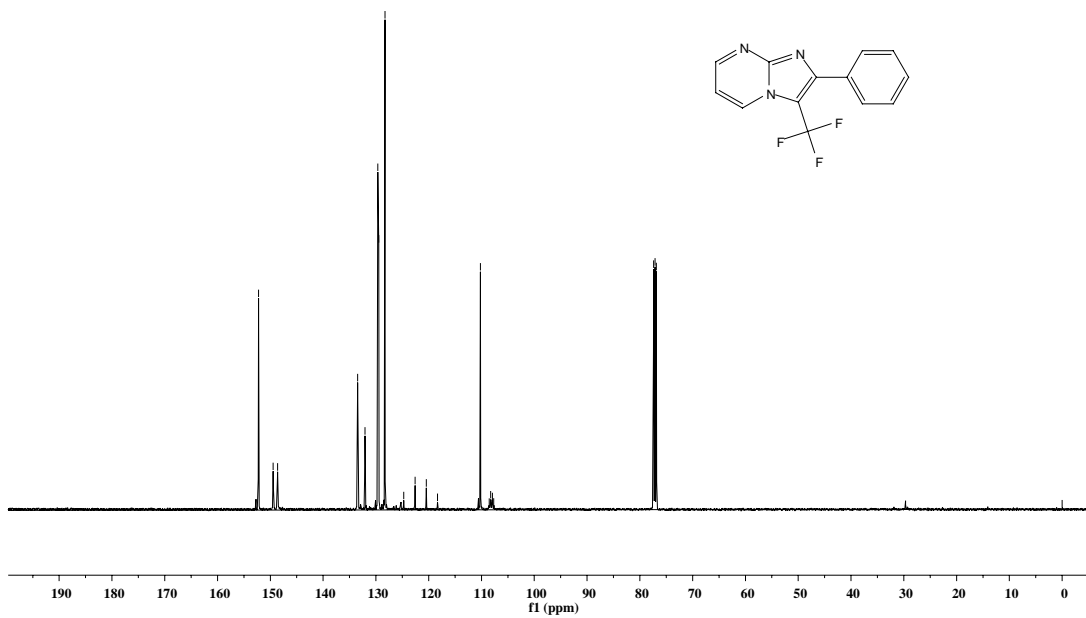

# 2-phenyl-4-(trifluoromethyl)-1H-imidazole (4e)

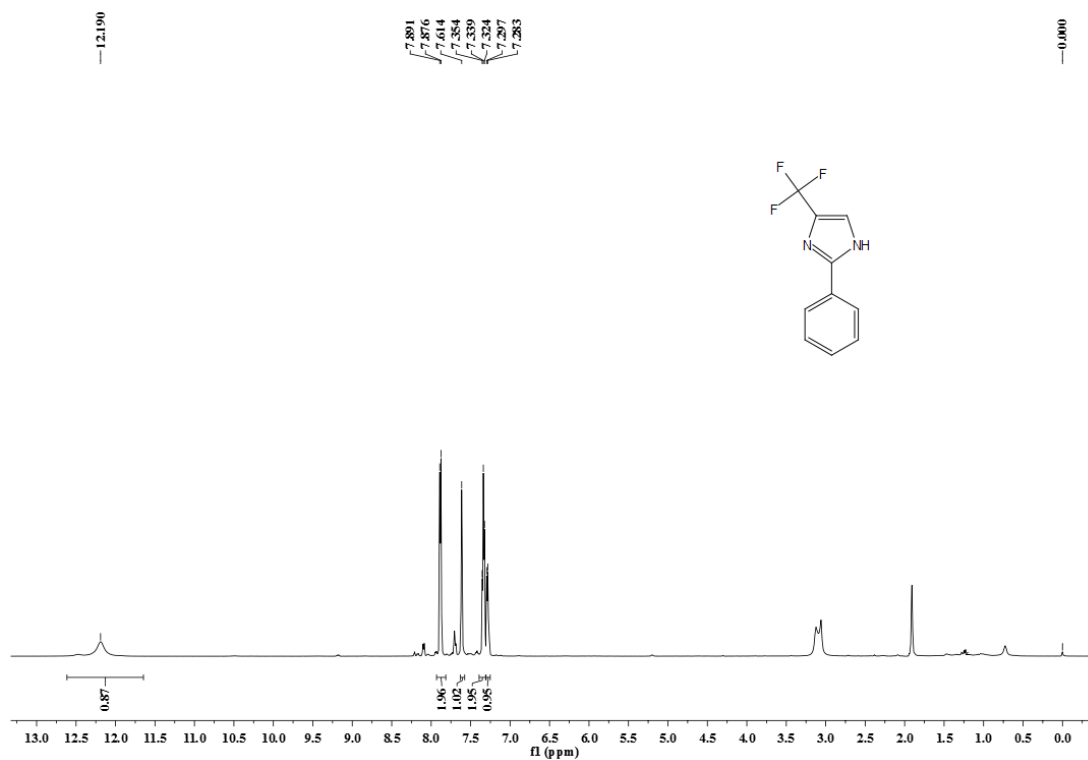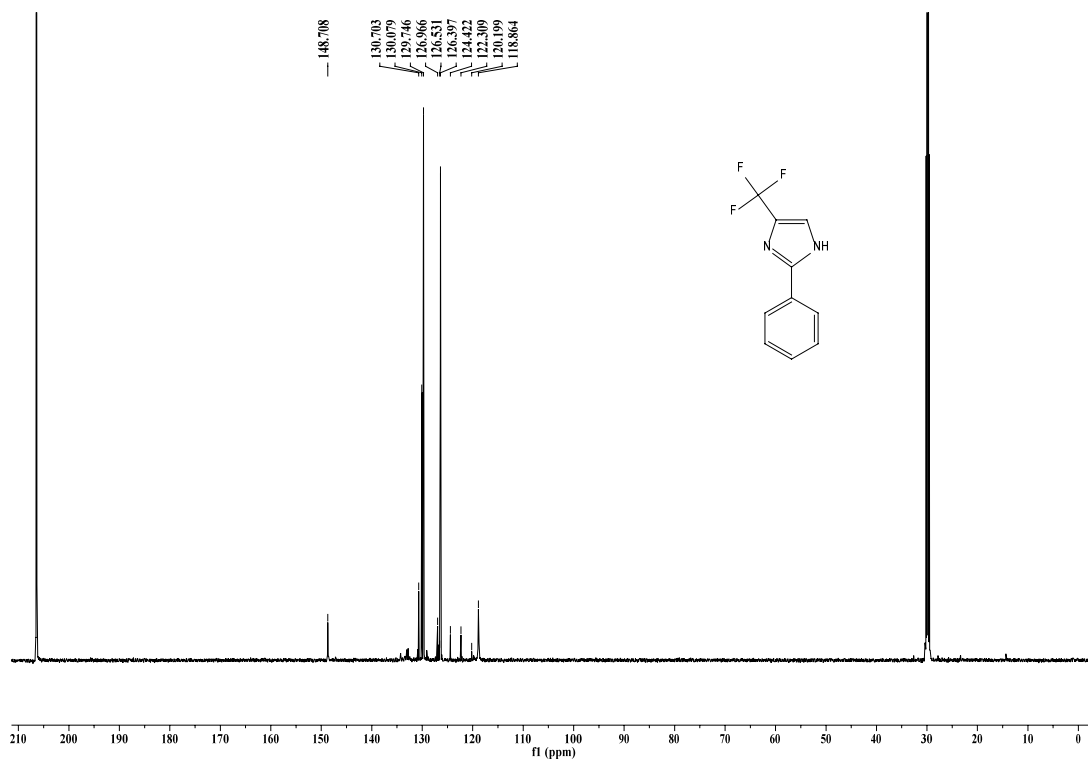

# 5-phenyl-4-(trifluoromethyl)-1H-imidazole (4f)

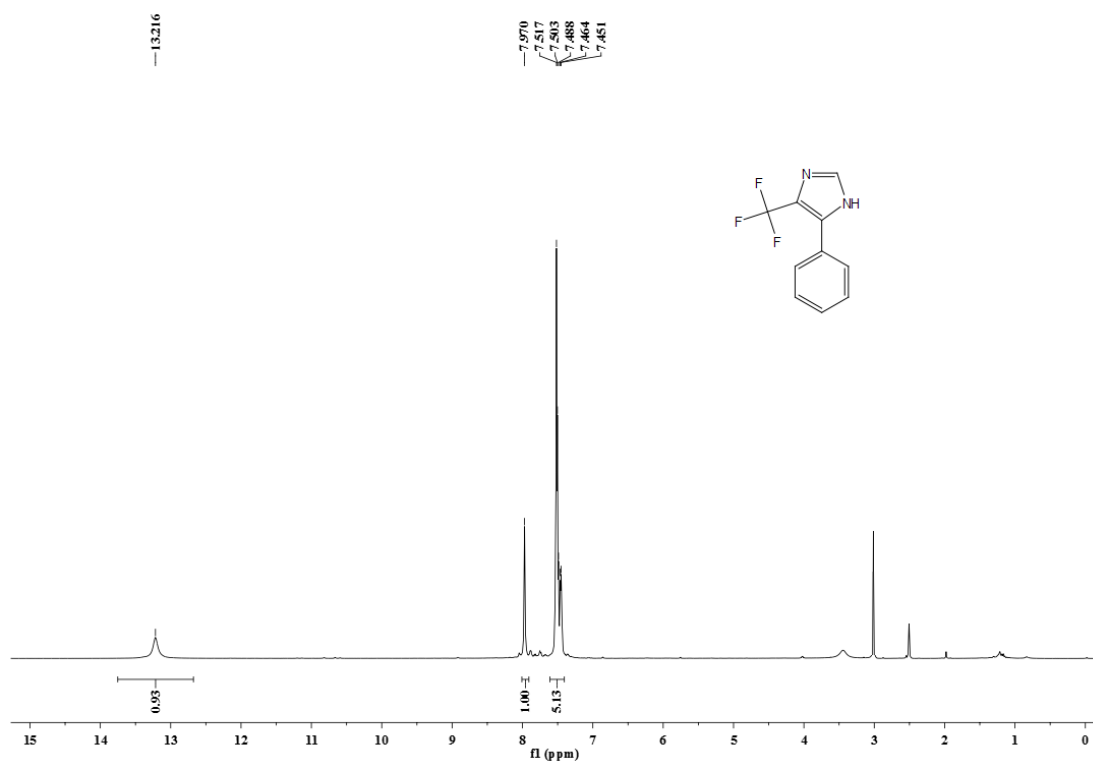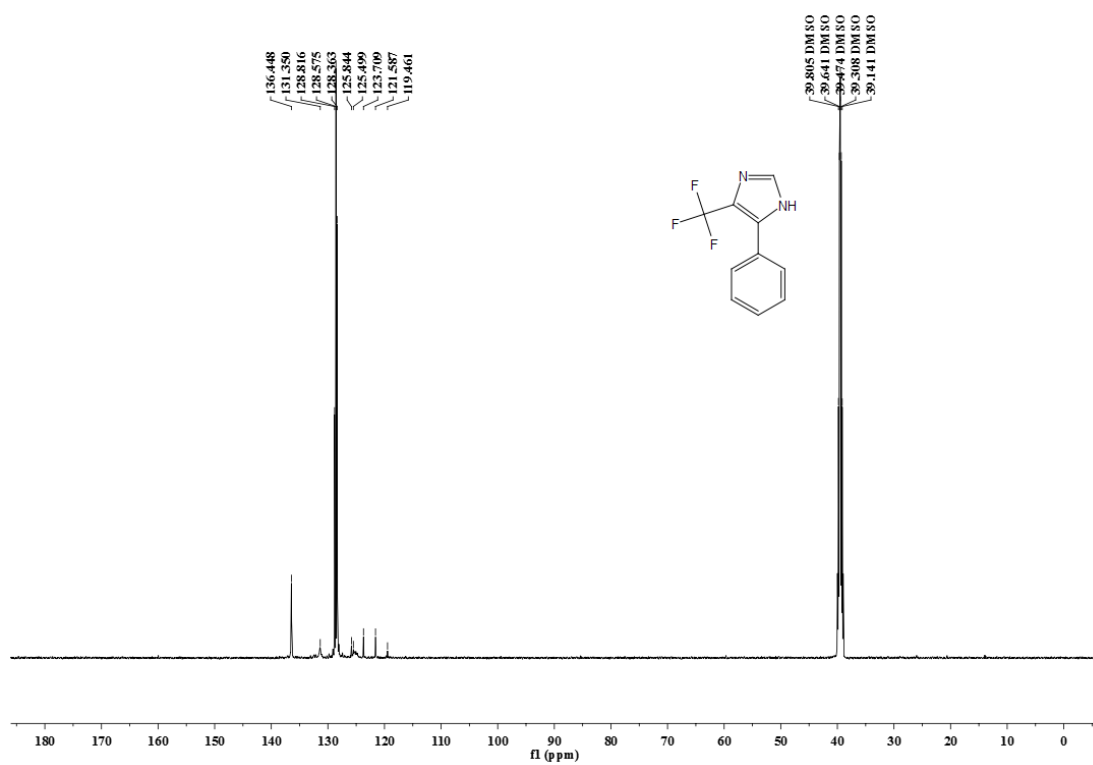

Supplement: c5ra02888d1.pdf [file c5ra02888d1.pdf]
